# Supplementary material for: Taxonomic analysis of Paraguayan samples of Homonota fasciata Duméril & Bibron (1836) with the revalidation of Homonota horrida Burmeister (1861) (Reptilia: Squamata: Phyllodactylidae) and the description of a new species
Source: PeerJ journal article supplement (doi:10.7717/peerj.3523), 2017-08-08
Supplement: Homonota_Cacciali_et_al_(SI).pdf [file Homonota_Cacciali_et_al_%28SI%29.pdf]

## Supplementary Information

---

|                                                                                     |    |
|-------------------------------------------------------------------------------------|----|
| <a href="#">Appendix S1. GenBank accession numbers (16S).....</a>                   | 2  |
| <a href="#">Appendix S2. Localities of specimens used for genetic analyses.....</a> | 3  |
| <a href="#">Appendix S3. GenBank accession numbers (multi-genes).....</a>           | 6  |
| <a href="#">Appendix S4. Primers used for genetic analyses.....</a>                 | 9  |
| <a href="#">Appendix S5. Examined specimens for morphology.....</a>                 | 12 |
| <a href="#">Appendix S6. Results of ABGD analysis.....</a>                          | 15 |
| <a href="#">Appendix S7. Results of PTP analysis.....</a>                           | 17 |
| <a href="#">Appendix S8. Individual gene trees.....</a>                             | 18 |
| <a href="#">Appendix S9. Concatenated trees.....</a>                                | 24 |
| <a href="#">Appendix S10. Most contributing variables for DA.....</a>               | 27 |
| <a href="#">Appendix S11. Matrix of metric data.....</a>                            | 28 |
| <a href="#">Appendix S12. Matrix of meristic data.....</a>                          | 31 |

## Appendix S1

### GenBank accession numbers (16S)

GenBank accession numbers (GBAN) of specimens used for genetic analyses with 16S mitochondrial gene for each voucher (institutional acronyms follow Sabaj Pérez, 2014).

Specimen indicated with <sup>1</sup> is currently BYU 47941.

| Country   | Specimen                    | GBAN     |
|-----------|-----------------------------|----------|
|           | LJAMM-CNP 5047 <sup>1</sup> | MF278828 |
| Argentina | LJAMM-CNP 10495             | MF278829 |
|           | LJAMM-CNP 10576             | MF278830 |
|           | MNHNP 11873                 | MF278831 |
| Paraguay  | MNHNP 12238                 | MF278832 |
|           | SMF 101984                  | MF278833 |

## Appendix S2

### Localities of specimens used for genetic analyses

Codes for countries are: ARG (Argentina), BRA (Brazil), CHI (Chile), PAR (Paraguay), and PER (Peru). Locality information is provided from the major political division of the country to the most specific location data. References to routes are RP (Provincial Route) and RN (National Route). Elevation is given in meters above sea level. Coordinates given with only one decimal are approximately, in which case elevation is not provided. Species treated as “*Homonota* sp. A” and “*Homonota* sp. B” were formerly referred as *H. fasciata*. Specimens with superindexes (<sup>1-3</sup>) are currently in BYU: 1- BYU 47960, 2- BYU 47941, 3- 47931.

| Species               | Voucher                     | Country | Specific locality                                             | Lat/Long           | Elevation |
|-----------------------|-----------------------------|---------|---------------------------------------------------------------|--------------------|-----------|
| <i>H. andicola</i>    | LJAMM-CNP 12490             | ARG     | Mendoza, Las Heras, RP 39, 3 km S from limit San Juan-Mendoza | -32.098°, -69.371° | 2231      |
|                       | LJAMM-CNP 12493             | ARG     | Mendoza, Las Heras, RP 39, 3 km S from limit San Juan-Mendoza | -32.098°, -69.371° | 2231      |
|                       | LJAMM-CNP 12494             | ARG     | Mendoza, Las Heras, RP 39, 3 km S from limit San Juan-Mendoza | -32.098°, -69.371° | 2231      |
|                       | LJAMM-CNP 12495             | ARG     | Mendoza, Las Heras, RP 39, 3 km S from limit San Juan-Mendoza | -32.098°, -69.371° | 2231      |
| <i>H. borellii</i>    | LJAMM-CNP 5842 <sup>1</sup> | ARG     | La Rioja, Anillaco                                            | -28.814°, -66.933° | 1362      |
|                       | LJAMM-CNP 12116             | ARG     | Santiago del Estero, Ojo de Agua, Sierra de Ambargasta        | -29.249°, -63.920° | 314       |
|                       | LJAMM-CNP 12125             | ARG     | Santiago del Estero, Ojo de Agua, Sierra de Ambargasta        | -29.249°, -63.920° | 314       |
| <i>H. darwini</i>     | LJAMM-CNP 9266              | ARG     | Santa Cruz, RP 45, E of Estancia El Cerrito                   | -46.263°, -71.378° | 640       |
|                       | LJAMM-CNP 9813              | ARG     | Santa Cruz, 4 km NE of Puerto Deseado                         | -47.715°, -65.839° | 16        |
|                       | LJAMM-CNP 10638             | ARG     | Santa Cruz, RP 77, ~500 m from detour to Estancia La María    | -48.498°, -68.864° | 214       |
|                       | LJAMM-CNP 11424             | ARG     | Santa Cruz, RN 3, 5 km N of Estancia El Rancho                | -46.781°, -67.354° | 266       |
|                       | LJAMM-CNP 11432             | ARG     | Santa Cruz, NR 3, 12 km S of detour to Cerro Vanguardia       | -48.512°, -67.731° | 85        |
| <i>Homonota</i> sp. A | LJAMM-CNP 5047 <sup>2</sup> | ARG     | Mendoza, RP 190, 2 km S (on road) from Punta del Agua         | -35.538°, -68.080° | 795       |
|                       | LJAMM-CNP 10495             | ARG     | Mendoza, RP 190, 2 km S (on road) from Punta del Agua         | -35.538°, -68.080° | 795       |
|                       | LJAMM-CNP 10505             | ARG     | La Pampa, RP 27, 4 km N of intersection with RP 14            | -36.668°, -68.022° | 767       |

**Taxonomic analysis of Paraguayan samples of *Homonota fasciata* Duméril & Bibron (1836) with the revalidation of *Homonota horrida* Burmeister (1861) (Reptilia: Squamata: Phyllodactylidae) and the description of a new species**

Cacciali P, Morando M, Medina CD, Köhler G, Motte M, Avila LJ - PeerJ 5:e3523; DOI 10.7717/peerj.3523

| Species                | Voucher         | Country | Specific locality                                                                | Lat/Long           | Elevation |
|------------------------|-----------------|---------|----------------------------------------------------------------------------------|--------------------|-----------|
|                        | LJAMM-CNP 10528 | ARG     | La Pampa, RP 16, 23 km W of intersection with RN 151                             | -37.075°, -67.785° | 538       |
|                        | LJAMM-CNP 10576 | ARG     | Mendoza, Secondary road 88 m from RP 190, 2.3 km S (on road) from Punta del Agua | -35.541°, -68.079° | 786       |
|                        | LJAMM-CNP 10577 | ARG     | Mendoza, Secondary road 88 m from RP 190, 2.3 km S (on road) from Punta del Agua | -35.541°, -68.079° | 786       |
|                        | LJAMM-CNP 12415 | ARG     | Neuquén, Secondary road, 80 m from RP 7, 13 km NW of Añelo                       | -38.264°, -68.891° | 477       |
|                        | MNHNP 11406     | PAR     | Boquerón, Parque Nacional Teniente Enciso                                        | -21.209°, -61.655° | 253       |
|                        | MNHNP 11409     | PAR     | Boquerón, Parque Nacional Teniente Enciso                                        | -21.209°, -61.655° | 253       |
| <i>Homonota</i> sp. B  | MNHNP 11873     | PAR     | Boquerón, Cruce San Miguel, in front to Parque Nacional Teniente Enciso          | -21.203°, -61.662° | 254       |
|                        | MNHNP 12238     | PAR     | Boquerón, Fortín Mayor Infante Rivarola                                          | -21.679°, -62.401° | 277       |
|                        | SMF 101984      | PAR     | Boquerón, Fortín Mayor Infante Rivarola                                          | -21.679°, -62.401° | 277       |
| <i>H. rupicola</i>     | RUPI-1          | PAR     | Cordillera, Cerro Pedregal                                                       | -25.515°, -57.042° | 288       |
|                        | RUPI-2          | PAR     | Cordillera, Cerro Pedregal                                                       | -25.515°, -57.042° | 288       |
| <i>H. taragui</i>      | LJAMM-CNP 14419 | ARG     | Corrientes, Paraje Tres Cerros, Cerro Capará                                     | -29.112°, -56.919° | 147       |
|                        | LJAMM-CNP 14420 | ARG     | Corrientes, Paraje Tres Cerros, Cerro Capará                                     | -29.112°, -56.919° | 147       |
| <i>H. underwoodi</i>   | LJAMM-CNP 10923 | ARG     | San Juan, Baños del Salado, 5 km N of Baños de la Laja                           | -31.313°, -68.446° | 641       |
|                        | LJAMM-CNP 10931 | ARG     | San Juan, 5.5 km E of Caucete                                                    | -31.662°, -68.209° | 580       |
|                        | UFRGS 1568      | BRA     | Rio Grande do Sul, Rosário do Sul                                                | -30.2°, -54.9°     |           |
|                        | UFRGS 2139      | BRA     | Rio Grande do Sul, Rosário do Sul                                                | -30.2°, -54.9°     |           |
| <i>H. uruguayensis</i> | UFRGS 2140      | BRA     | Rio Grande do Sul, Rosário do Sul                                                | -30.2°, -54.9°     |           |
|                        | UFRGS 2579      | BRA     | Rio Grande do Sul, Rosário do Sul                                                | -30.2°, -54.9°     |           |
|                        | UFRGS 2580      | BRA     | Rio Grande do Sul, Rosário do Sul                                                | -30.2°, -54.9°     |           |
|                        | UFRGS 3929      | BRA     | Rio Grande do Sul, Rosário do Sul                                                | -30.2°, -54.9°     |           |
| <i>H. whitii</i>       | LJAMM-CNP 12110 | ARG     | Catamarca, W of Animán                                                           | -29.358°, -63.949° | 410       |
|                        | LJAMM-CNP 12111 | ARG     | Catamarca, W of Animán                                                           |                    |           |

**Taxonomic analysis of Paraguayan samples of *Homonota fasciata* Duméril & Bibron (1836) with the revalidation of *Homonota horrida* Burmeister (1861) (Reptilia: Squamata: Phyllodactylidae) and the description of a new species**

Cacciali P, Morando M, Medina CD, Köhler G, Motte M, Avila LJ - PeerJ 5:e3523; DOI 10.7717/peerj.3523

| Species               | Voucher                     | Country | Specific locality                                            | Lat/Long           | Elevation |
|-----------------------|-----------------------------|---------|--------------------------------------------------------------|--------------------|-----------|
|                       | LJAMM-CNP 14387             | ARG     | Córdoba, Tulumba, RP 18, 9.5 km N of intersection with RP 16 | -30.332°, -64.207° | 907       |
|                       | LJAMM-CNP 14388             | ARG     | Córdoba, Tulumba, RP 18, 9.5 km N of intersection with RP 16 | -30.332°, -64.207° | 907       |
| <i>H. williamsii</i>  | LJAMM-CNP 4467 <sup>3</sup> | ARG     | Buenos Aires, Tornquist, Parque Provincial Ernesto Tornquist | -38.055°, -62.014° | 822       |
|                       | LJAMM-CNP 6517              | ARG     | Buenos Aires, Tornquist, Parque Provincial Ernesto Tornquist | -38.136°, -61.986° | 589       |
|                       | LJAMM-CNP 6518              | ARG     | Buenos Aires, Tornquist, Parque Provincial Ernesto Tornquist | -38.136°, -61.986° | 589       |
| <i>Garthia</i>        | IBE-G1(1)                   | CHI     | Unknown locality                                             |                    |           |
| <i>gaudichaudi</i>    | IBE-G1(2)                   | CHI     | Unknown locality                                             |                    |           |
| <i>Gymnodactylus</i>  | LG 911                      | BRA     | Alagoas, Xingo                                               |                    |           |
| <i>geckoides</i>      | LG 1050                     | BRA     | Sergipe, Barra dos Coqueiros                                 | -10.9°, -37.0°     |           |
| <i>Phyllodactylus</i> | TG 266                      | PER     | Chongoyape, Lambayeque                                       | -6.7°, -79.9°      |           |
| <i>kofordi</i>        |                             |         |                                                              |                    |           |
| <i>Phyllopezus</i>    | CHUNB 57388                 | BRA     | Ceara, Tianguá                                               | -3.7°, -40.9°      |           |
| <i>pollicaris</i>     |                             |         |                                                              |                    |           |
| <i>Phyllopezus</i>    | LJAMM-CNP 12089             | ARG     | Chaco, Fuerte Esperanza                                      | -25.160°, -61.844° | 169       |
| <i>przewalskii</i>    |                             |         |                                                              |                    |           |

### Appendix S3

#### GenBank accession numbers (multi-genes)

GenBank accession numbers for each gene, and numbers of new sequences highlighted in bold. MD indicates missing data. Specimens with superindexes (<sup>1-3</sup>) are currently in BYU: 1- BYU 47960, 2- BYU 47941, 3- 47931.

| Species               | Voucher                     | ANL-19b  | ANL-30b  | RBMX     | NKTR     | SINCAIP  | MXRA5    | ACA4     | DMXL1    | PRLR     | 12S      | Cytb     |
|-----------------------|-----------------------------|----------|----------|----------|----------|----------|----------|----------|----------|----------|----------|----------|
| <i>H. andicola</i>    | LJAMM-CNP 12490             | KJ484255 | KJ484235 | KJ484346 | KJ484394 | KJ484369 | KJ484348 | KJ484324 | KJ484298 | KJ484274 | MD       | MD       |
|                       | LJAMM-CNP 12493             | MD       | MD       | MD       | MD       | MD       | MD       | MD       | MD       | MD       | KJ484211 | KJ484188 |
|                       | LJAMM-CNP 12494             | MD       | MD       | MD       | MD       | MD       | MD       | KJ484325 | MD       | MD       | MD       | MD       |
|                       | LJAMM-CNP 12495             | KJ484256 | KJ484236 | KJ484347 | KJ484395 | MD       | KJ484349 | MD       | KJ484299 | KJ484275 | KJ484212 | KJ484189 |
| <i>H. borellii</i>    | LJAMM-CNP 5842 <sup>1</sup> | MD       | MD       | MD       | MD       | KJ484370 | MD       | MD       | MD       | MD       | MD       | MD       |
|                       | LJAMM-CNP 12116             | KJ484257 | KJ484237 | KJ484411 | KJ484396 | MD       | KJ484350 | KJ484326 | KJ484300 | KJ484276 | KJ484213 | KJ484205 |
|                       | LJAMM-CNP 12125             | KJ484258 | KJ484238 | KJ484412 | KJ484397 | KJ484393 | KJ484351 | KJ484327 | KJ484301 | KJ484277 | KJ484214 | KJ484206 |
| <i>H. darwinii</i>    | LJAMM-CNP 9266              | KJ484260 | KJ484240 | KJ484414 | KJ484409 | KJ484372 | KJ484352 | KJ484329 | KJ484303 | MD       | MD       | KJ484191 |
|                       | LJAMM-CNP 9813              | MD       | MD       | MD       | MD       | MD       | MD       | MD       | MD       | KJ484278 | MD       | MD       |
|                       | LJAMM-CNP 10638             | MD       | MD       | MD       | MD       | MD       | MD       | MD       | MD       | KJ484295 | MD       | MD       |
|                       | LJAMM-CNP 11424             | MD       | KJ484239 | KJ484413 | KJ484408 | KJ484371 | KJ484367 | KJ484328 | KJ484302 | MD       | KJ484215 | KJ484190 |
|                       | LJAMM-CNP 11432             | KJ484259 | MD       | MD       | MD       | MD       | MD       | MD       | MD       | MD       | KJ484216 | MD       |
| <i>Homonota</i> sp. A | LJAMM-CNP 5047 <sup>2</sup> | KJ484262 | KJ484242 | KJ484416 | MD       | KJ484374 | KJ484354 | MD       | KJ484305 | KJ484280 | KJ484218 | KJ484192 |
|                       | LJAMM-CNP 10505             | MD       | MD       | MD       | MD       | KJ484373 | MD       | KJ484330 | MD       | MD       | MD       | MD       |
|                       | LJAMM-CNP 10528             | MD       | MD       | MD       | KJ484399 | MD       | MD       | KJ484331 | MD       | MD       | MD       | MD       |
|                       | LJAMM-CNP 10577             | KJ484261 | KJ484241 | KJ484415 | KJ484398 | MD       | KJ484353 | MD       | KJ484304 | MD       | KJ484217 | KJ484208 |
|                       | LJAMM-CNP 12415             | MD       | MD       | MD       | MD       | MD       | MD       | MD       | MD       | KJ484279 | MD       | MD       |

**Taxonomic analysis of Paraguayan samples of *Homonota fasciata* Duméril & Bibron (1836) with the revalidation of *Homonota horrida* Burmeister (1861)**

**(Reptilia: Squamata: Phyllodactylidae) and the description of a new species**

Cacciali P, Morando M, Medina CD, Köhler G, Motte M, Avila LJ - PeerJ 5:e3523; DOI 10.7717/peerj.3523

| Species                | Voucher                     | ANL-19b  | ANL-30b  | RBMX     | NKTR     | SINCAIP  | MXRA5    | ACA4     | DMXL1    | PRLR     | 12S      | Cytb     |
|------------------------|-----------------------------|----------|----------|----------|----------|----------|----------|----------|----------|----------|----------|----------|
| <i>Homonota</i> sp. B  | MNHNP 11406                 | MF278837 | MF278839 | MF278851 | MF278847 | MF278853 | MF278845 | MF278841 | MD       | MF278849 | MF278835 | MF278843 |
|                        | MNHNP 11409                 | MF278838 | MF278840 | MF278852 | MF278848 | MF278854 | MF278846 | MF278842 | MF535517 | MF278850 | MF278836 | MF278844 |
| <i>H. rupicola</i>     | RUPI-1                      | KJ484263 | KJ484243 | KJ484426 | MD       | KJ484375 | MD       | MD       | KJ484306 | KJ484281 | KJ484219 | KJ484193 |
|                        | RUPI-2                      | KJ484264 | KJ484244 | KJ484427 | KJ484410 | KJ484376 | MD       | MD       | KJ484320 | KJ484282 | KJ484220 | KJ484194 |
| <i>H. taragui</i>      | LJAMM-CNP 14419             | KJ484265 | KJ484245 | KJ484428 | MD       | KJ484377 | MD       | KJ484332 | KJ484321 | KJ484283 | KJ484221 | KJ484195 |
|                        | LJAMM-CNP 14420             | KJ484266 | KJ484246 | KJ484429 | KJ484400 | KJ484378 | MD       | KJ484333 | KJ484322 | KJ484284 | KJ484222 | KJ484196 |
| <i>H. underwoodi</i>   | LJAMM-CNP 10923             | KJ484269 | KJ484249 | MD       | KJ484402 | KJ484381 | KJ484356 | KJ484335 | KJ484308 | KJ484286 | MD       | KJ484197 |
|                        | LJAMM-CNP 10931             | KJ484270 | KJ484250 | MD       | KJ484403 | KJ484382 | KJ484357 | MD       | KJ484309 | KJ484297 | MD       | KJ484198 |
| <i>H. uruguayensis</i> | UFRGS 1568                  | KJ484267 | KJ484247 | KJ484430 | KJ484401 | KJ484381 | KJ484358 | KJ484334 | KJ484307 | KJ484285 | KJ484223 | MD       |
|                        | UFRGS 2139                  | MD       | MD       | MD       | MD       | KJ484382 | MD       | MD       | MD       | KJ484296 | MD       | MD       |
|                        | UFRGS 2140                  | MD       | MD       | MD       | MD       | MD       | MD       | MD       | MD       | MD       | KJ484224 | MD       |
|                        | UFRGS 2579                  | KJ484268 | KJ484248 | KJ484359 | MD       | MD       | MD       | MD       | MD       | MD       | MD       | MD       |
|                        | UFRGS 2580                  | MD       | MD       | MD       | MD       | MD       | MD       | MD       | MD       | MD       | MD       | KJ484202 |
|                        | UFRGS 3929                  | MD       | MD       | MD       | MD       | MD       | MD       | MD       | KJ484323 | MD       | MD       | MD       |
| <i>H. whitii</i>       | LJAMM-CNP 12110             | MD       | KJ484251 | KJ484360 | MD       | KJ484383 | KJ484359 | KJ484336 | MD       | MD       | MD       | MD       |
|                        | LJAMM-CNP 12111             | KJ484271 | MD       | MD       | MD       | MD       | KJ484360 | KJ484337 | MD       | MD       | MD       | MD       |
|                        | LJAMM-CNP 14387             | MD       | MD       | MD       | KJ484404 | MD       | MD       | MD       | KJ484310 | MD       | KJ484225 | KJ484203 |
|                        | LJAMM-CNP 14388             | MD       | KJ484252 | KJ484432 | KJ484405 | KJ484384 | MD       | MD       | KJ484311 | MD       | KJ484226 | KJ484204 |
| <i>H. williamsii</i>   | LJAMM-CNP 4467 <sup>3</sup> | KJ484272 | KJ484253 | KJ484417 | MD       | KJ484385 | KJ484360 | KJ484338 | KJ484312 | KJ484287 | KJ484227 | KJ484205 |
|                        | LJAMM-CNP 6517              | KJ484273 | KJ484254 | KJ484418 | KJ484407 | KJ484386 | KJ484361 | KJ484339 | KJ484313 | KJ484288 | KJ484228 | KJ484206 |
|                        | LJAMM-CNP 6518              | MD       | MD       | MD       | KJ484406 | MD       | MD       | MD       | MD       | MD       | MD       | MD       |
| <i>Garthia</i>         | IBE-G1(1)                   | MD       | MD       | KJ484419 | MD       | KJ484387 | KJ484362 | MD       | KJ484314 | KJ484289 | KJ484229 | MD       |
| <i>gaudichaudi</i>     | IBE-G1(2)                   | MD       | MD       | KJ484420 | MD       | MD       | MD       | KJ484340 | MD       | MD       | KJ484230 | MD       |
| <i>Gymnodactylus</i>   | LG 911                      | MD       | MD       | KJ484421 | MD       | KJ484389 | KJ484364 | KJ484342 | KJ484316 | KJ484291 | KJ484232 | KJ484210 |
|                        | <i>geckoides</i>            | LG 1050  | MD       | MD       | KJ484431 | MD       | KJ484388 | KJ484363 | KJ484341 | KJ484315 | KJ484290 | KJ484231 |

**Taxonomic analysis of Paraguayan samples of *Homonota fasciata* Duméril & Bibron (1836) with the revalidation of *Homonota horrida* Burmeister (1861) (Reptilia: Squamata: Phyllodactylidae) and the description of a new species**

Cacciali P, Morando M, Medina CD, Köhler G, Motte M, Avila LJ - PeerJ 5:e3523; DOI 10.7717/peerj.3523

| Species                        | Voucher         | ANL-19b | ANL-30b | RBMX     | NKTR | SINCAIP  | MXRA5    | ACA4     | DMXL1    | PRLR     | 12S      | Cytb     |
|--------------------------------|-----------------|---------|---------|----------|------|----------|----------|----------|----------|----------|----------|----------|
| <i>Phyllodactylus kofordi</i>  | TG 266          | MD      | MD      | KJ484422 | MD   | KJ484390 | KJ484368 | KJ484343 | KJ484317 | KJ484292 | KJ484233 | KJ484207 |
| <i>Phyllopezus pollicaris</i>  | CHUNB 57388     | MD      | MD      | KJ484424 | MD   | KJ484392 | KJ484366 | KJ484345 | KJ484319 | KJ484294 | KJ484234 | KJ484204 |
| <i>Phyllopezus przewalskii</i> | LJAMM-CNP 12089 | MD      | MD      | KJ484423 | MD   | KJ484391 | KJ484365 | MD       | KJ484318 | KJ484293 | MD       | KJ484203 |



### Appendix S4

#### Primers used for genetic analyses

Primers' sequences for each gene, used for analyses. For every primer we indicate the author, and the full reference is provided below the table. We maintain the original name of the primers, providing an indication for forward (F) and reverse (R) primers in square brackets when not specified in the original name.

| Gene    | Primer    | Sequence (5' -> 3')      | Author              |
|---------|-----------|--------------------------|---------------------|
| 16S     | L2510 [F] | GCCTGTTTAACAAAAACAT      | Miya & Nishida 1996 |
|         | H3056 [R] | CGGTCTG AACTCAGATCACGT   | Miya & Nishida 1996 |
| 12S     | tPhe [F]  | AGCACRGCCTGA             | Wiens et al. 1999   |
|         | 12e [R]   | RCGCTTACCWTGTTAC         | Wiens et al. 1999   |
| Cytb    | CB3       | GGCAAATAGGAARTATCATTC    | Palumbi 1996        |
|         | CB3R      | CATATTAACCCGAATGATAYTT   | Palumbi 1996        |
| ANL-19b | Homo19b_F | CCTAAGAAAAGAGAAGGCAATTCA | Morando et al. 2014 |
|         | Homo19b_R | TGCATGCTACTCAGATTCCTG    | Morando et al. 2014 |
| ANL-30b | Homo30b_F | CAATCCAGTCGAAGGAAGGA     | Morando et al. 2014 |
|         | Homo30b_R | AAACTTGGTTGGGTGCAGAG     | Morando et al. 2014 |
| RBMX    | HNRNP1F   | CCACGAGATTATGCCTACCG     | Gamble et al. 2011  |
|         | HNRNP1R   | CATCATAKCGACTGCTTCCA     | Gamble et al. 2011  |
|         | RBMX-F1   | TCCTCTTACAGTGAYCGTGATG   | Gamble et al. 2011  |

**Taxonomic analysis of Paraguayan samples of *Homonota fasciata* Duméril & Bibron (1836) with the revalidation of *Homonota horrida* Burmeister (1861) (Reptilia: Squamata: Phyllodactylidae) and the description of a new species**

Cacciali P, Morando M, Medina CD, Köhler G, Motte M, Avila LJ - PeerJ 5:e3523; DOI 10.7717/peerj.3523

|         |            |                              |                        |
|---------|------------|------------------------------|------------------------|
|         | RBMX-R1    | TCCCGTAATCATCATAGCGACT       | Gamble et al. 2011     |
| NKTR    | NTKRf1     | AGTAAATGGGAYTCKGARTCAAA      | Townsend et al. 2011   |
|         | NKTRr3     | KCGTGCGYGTCTTYCTWACTTCA      | Townsend et al. 2011   |
| SINCAIP | SNCAIP_f10 | CGCCAGYTGYYTGGGARGAWAT       | Townsend et al. 2008   |
|         | SNCAIP_r13 | GGWGAYTTGAGDGCCTCTTRGGRCT    | Townsend et al. 2008   |
| MXRA5   | MXRA5_F1   | YATTTTGGCAAARGTCCGTGGGAARA   | Portik et al. 2012.    |
|         | MXRA5_F2   | KGCTGAGCCTKCCTGGGTGA         | Portik et al. 2012.    |
|         | MXRA5_R1   | WTGTGCTGCATATGCTGTWATCTCWGGT | Portik et al. 2012.    |
|         | MXRA5_R2   | YCTMCGGCCYTCTGCAACATTK       | Portik et al. 2012.    |
| ACA4    | ACA4 [F]   | GAGCGTGGCTAYTCCTTTGT         | Waltari & Edwards 2002 |
|         | ACA4 [R]   | GTGGCCATTTTCATTCTCAA         | Waltari & Edwards 2002 |
| DMXL1   | DMXL1(F2)  | GTCTAGGGAGGATGGTTCACATA      | Werneck et al. 2012    |
|         | DMXL1(R2)  | GAATGAAGCAAGTGACSAGAAAGA     | Werneck et al. 2012    |
| PRLR    | PRLR_f1    | GACARYGARGACCAGCAACTRATGCC   | Townsend et al. 2008   |
|         | PRLR_r3    | GACYTTGTGRACTTCYACRTAATCCAT  | Townsend et al. 2008   |

**References**

Gamble T, Daza JD, Colli RC, Vitt LJ, Bauer AM. 2011. A new genus of miniaturized and pug-nosed gecko from South America (Sphaerodactylidae: Gekkota). *Zoological Journal of the Linnean Society*, 163(4): 1244–1266. doi: 10.1111/j.1096-3642.2011.00741.x

**Taxonomic analysis of Paraguayan samples of *Homonota fasciata* Duméril & Bibron (1836) with the revalidation of *Homonota horrida* Burmeister (1861) (Reptilia: Squamata: Phyllodactylidae) and the description of a new species**

Cacciali P, Morando M, Medina CD, Köhler G, Motte M, Avila LJ - PeerJ 5:e3523; DOI 10.7717/peerj.3523

- Miya M, Nishida M. 1996. Molecular phylogenetic perspective on the evolution of the deep-sea fish genus *Cyclothone* (Stomiiformes: Gonostomatidae). *Ichthyological Research* 43(4):375–398. doi: 10.1007/BF02347637
- Morando M, Medina CD, Ávila LJ, Pérez CHF, Buxton A, Sites JW. 2014. Molecular phylogeny of the New World gecko genus *Homonota* (Squamata: Phyllodactylidae). *Zoologica Scripta* 43(3):249–260. doi: 10.1111/zsc.12052
- Palumbi SR. 1996. Nucleic Acids II: The Polymerase Chain Reaction. In: Hillis DM, Moritz C, Mable BK, eds. *Molecular Systematics*, 2<sup>nd</sup> ed. Massachusetts: Sinauer Associates, Inc., 205–247.
- Portik DM, Wood PL, Grismer JL, Stanley EL, Jackman TR. 2012. Identification of 104 rapidly-evolving nuclear protein-coding markers for amplification across scaled reptiles using genomic resources. *Conservation Genetics Resources* 4(1):1–10. doi: 10.1007/s12686-011-9460-1
- Townsend TM, Alegre RE, Kelley ST, Wiens JJ, Reeder TW. 2008. Rapid development of multiple nuclear loci for phylogenetic analysis using genomic resources: An example from squamate reptiles. *Molecular Phylogenetics and Evolution* 47(1):129–142. <http://doi.org/10.1016/j.ympev.2008.01.008>
- Townsend TM, Mulcahy DG, Noonan BP, Sites JW, Kuczynski CA, Reeder TW. 2011. Phylogeny of iguanian lizards inferred from 29 nuclear loci, and a comparison of concatenated and species-tree approaches for an ancient, rapid radiation. *Molecular Phylogenetics and Evolution* 61(2):363–380. doi: 10.1016/j.ympev.2011.07.008
- Waltari E, Edwards SV. 2002. Evolutionary dynamics of intron size, genome size, and physiological correlates in archosaurs. *American Naturalist* 160(5):539–552. doi: 10.1086/342079
- Werneck FP, Gamble T, Colli GR, Rodrigues MT, Sites JW. 2012. Deep diversification and long term persistence in the South American “Dry Diagonal”. Integrating continent-wide phylogeography and distribution modeling of geckos. *Evolution* 66(10):3014–3034. doi: 10.1111/j.1558-5646.2012.01682.x
- Wiens JJ, Reeder TW, Nieto Montes de Oca A. 1999. Molecular phylogenetics and evolution of sexual dichromatism among populations of the Yarrow’s spiny lizard (*Sceloporus jarrovii*). *Evolution* 53(6):1884–1897. doi: 10.2307/2640448

## Appendix S5

### Examined specimens for morphology

Specimens used for morphological comparison. Specimens marked with “[H]” and “[P]” indicate holotype and paralectotypes of *Gymnodactylus horridus* respectively. Codes for countries are: ARG (Argentina), BOL (Bolivia), and PAR (Paraguay). Locality information is provided from the major political division of the country to the most specific location data. References to routes are RP (Provincial Route) and RN (National Route). Coordinates given with only one decimal are approximately, in which case elevation is not provided.

| Specimen       | Country | Specific locality                                 | Lat/Long           | Elevation |
|----------------|---------|---------------------------------------------------|--------------------|-----------|
| IZH-R 1 [H]    | ARG     | Mendoza, Canyons of the Sierra del Challao        | -32.9°, -68.9°     |           |
| IZH-R 2 [P]    | ARG     | Mendoza, Canyons of the Sierra del Challao        | -32.9°, -68.9°     |           |
| IZH-R 3 [P]    | ARG     | Mendoza, Canyons of the Sierra del Challao        | -32.9°, -68.9°     |           |
| LJAMM-CNP 6520 | ARG     | Río Negro, Villa Regina, fosa del tiro federal    | -39.096°, -67.051° | 214       |
| LJAMM-CNP 6530 | ARG     | Río Negro, Villa Regina, bardas                   | -39.092°, -67.076° | 261       |
| LJAMM-CNP 6532 | ARG     | Río Negro, Villa Regina, bardas                   | -39.092°, -67.076° | 261       |
| LJAMM-CNP 6533 | ARG     | Río Negro, Villa Regina, bardas                   | -39.092°, -67.076° | 261       |
| LJAMM-CNP 6535 | ARG     | Río Negro, Villa Regina, bardas                   | -39.092°, -67.076° | 261       |
| LJAMM-CNP 6967 | ARG     | Neuquén, Villa El Chocón, N margin of Limay river | -39.254°, -68.781° | 469       |
| LJAMM-CNP 6968 | ARG     | Neuquén, Villa El Chocón                          | -39.254°, -68.781° | 469       |

**Taxonomic analysis of Paraguayan samples of *Homonota fasciata* Duméril & Bibron (1836) with the revalidation of *Homonota horrida* Burmeister (1861) (Reptilia: Squamata: Phyllodactylidae) and the description of a new species**

Cacciali P, Morando M, Medina CD, Köhler G, Motte M, Avila LJ - PeerJ 5:e3523; DOI 10.7717/peerj.3523

| Specimen        | Country | Specific locality                                  | Lat/Long           | Elevation |
|-----------------|---------|----------------------------------------------------|--------------------|-----------|
| LJAMM-CNP 7670  | ARG     | Río Negro, Avellaneda, Chimpay                     | -39.145°, -66.145  | 157       |
| LJAMM-CNP 7674  | ARG     | Río Negro, Avellaneda, Chimpay                     | -39.145°, -66.145  | 157       |
| LJAMM-CNP 7804  | ARG     | Neuquén, RP 5, 10 km N from RP 7                   | -37.906°, -69.174° | 555       |
| LJAMM-CNP 8713  | ARG     | Neuquén, RP 7, 41 km NW Punta Carranza             | -37.656°, -69.472° | 662       |
| LJAMM-CNP 10493 | ARG     | Mendoza, RP 190, 1 km S Punta de Agua              | -35.541°, -68.079° | 789       |
| LJAMM-CNP 10496 | ARG     | Mendoza, RP 190, 1 km S Punta de Agua              | -35.541°, -68.079° | 789       |
| LJAMM-CNP 10523 | ARG     | La Pampa, RP 1, 23.6 km W intersection with RN 151 | -37.075°, -67.785° | 542       |
| LJAMM-CNP 10526 | ARG     | La Pampa, RP 1, 23.6 km W intersection with RN 151 | -37.075°, -67.785° | 542       |
| LJAMM-CNP 10576 | ARG     | Mendoza, RP 190, 1 km S Punta de Agua              | -35.541°, -68.079° | 789       |
| LJAMM-CNP 10577 | ARG     | Mendoza, RP 190, 1 km S Punta de Agua              | -35.541°, -68.079° | 789       |
| LJAMM-CNP 10578 | ARG     | La Pampa, RP 27, 37.7 km S intersection with RP 14 | -36.668°, -68.022° | 766       |
| LJAMM-CNP 10579 | ARG     | La Pampa, RP 27, 37.7 km S junction with RP 14     | -36.668°, -68.022° | 766       |
| LJAMM-CNP 10584 | ARG     | La Pampa, RP 1, 23.6 km W intersection with RN 151 | -37.075°, -67.785° | 542       |
| LJAMM-CNP 13948 | ARG     | Neuquén, RN 237, 6 km SW Picun Leufu               | -39.555°, -69.301° | 431       |
| LJAMM-CNP 14551 | ARG     | Neuquén, Mina La Casualidad                        | -37.904°, -68.488° | 462       |
| MNHNP 2821      | PAR     | Boquerón, Parque Nacional Teniente Enciso          | -21.209°, -61.655  | 253       |

**Taxonomic analysis of Paraguayan samples of *Homonota fasciata* Duméril & Bibron (1836) with the revalidation of *Homonota horrida* Burmeister (1861) (Reptilia: Squamata: Phyllodactylidae) and the description of a new species**

Cacciali P, Morando M, Medina CD, Köhler G, Motte M, Avila LJ - PeerJ 5:e3523; DOI 10.7717/peerj.3523

| Specimen    | Country | Specific locality                                                       | Lat/Long           | Elevation |
|-------------|---------|-------------------------------------------------------------------------|--------------------|-----------|
| MNHNP 9037  | PAR     | Boquerón, Parque Nacional Teniente Enciso                               | -21.209°, -61.655  | 253       |
| MNHNP 9038  | PAR     | Boquerón, Parque Nacional Teniente Enciso                               | -21.209°, -61.655  | 253       |
| MNHNP 9131  | PAR     | Boquerón, Parque Nacional Teniente Enciso                               | -21.209°, -61.655  | 253       |
| MNHNP 11406 | PAR     | Boquerón, Parque Nacional Teniente Enciso                               | -21.209°, -61.655  | 253       |
| MNHNP 11410 | PAR     | Boquerón, Parque Nacional Teniente Enciso                               | -21.209°, -61.655  | 253       |
| MNHNP 11419 | PAR     | Boquerón, Parque Nacional Teniente Enciso                               | -21.209°, -61.655  | 253       |
| MNHNP 11421 | PAR     | Boquerón, Parque Nacional Teniente Enciso                               | -21.209°, -61.655  | 253       |
| MNHNP 11423 | PAR     | Boquerón, Parque Nacional Teniente Enciso                               | -21.209°, -61.655  | 253       |
| MNHNP 11850 | PAR     | Boquerón, Cruce San Miguel, in front of Parque Nacional Teniente Enciso | -21.203°, -61.662° | 254       |
| MNHNP 11855 | PAR     | Boquerón, Cruce San Miguel, in front of Parque Nacional Teniente Enciso | -21.203°, -61.662° | 254       |
| MNHNP 11860 | PAR     | Boquerón, Cruce San Miguel, in front of Parque Nacional Teniente Enciso | -21.203°, -61.662° | 254       |
| MNHNP 11872 | PAR     | Boquerón, Cruce San Miguel, in front of Parque Nacional Teniente Enciso | -21.203°, -61.662° | 254       |
| MNHNP 12238 | PAR     | Boquerón, Fortín Mayor Infante Rivarola                                 | -21.679°, -62.401° | 277       |
| SMF 29277   | BOL     | Tarija, Villamontes                                                     | -21.266°, -63.451° | 398       |
| SMF 101984  | PAR     | Boquerón, Fortín Mayor Infante Rivarola                                 | -21.679°, -62.401° | 277       |

## Appendix S6

### Results of ABGD analysis

Number of groups according to the prior intraspecific divergence. Color of “Initial Partitions” were modified from original for a better contrast. Under the graphic, is presented the list of partitions with suggested grouping and each maximal intraspecific divergence.

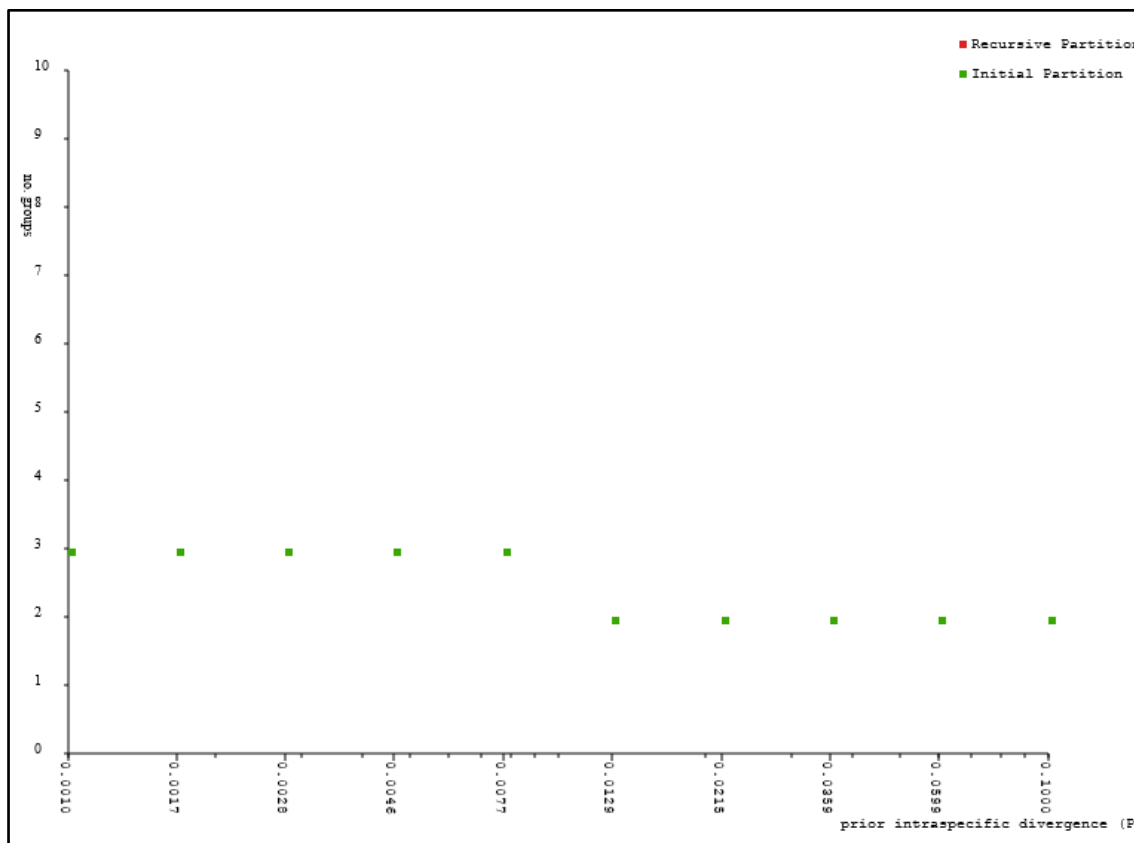

Partition 1 : found 3 groups (prior maximal distance P= 0.001000)

Partition 2 : found 3 groups (prior maximal distance P= 0.001668)

Partition 3 : found 3 groups (prior maximal distance P= 0.002783)

Partition 4 : found 3 groups (prior maximal distance P= 0.004642)

Partition 5 : found 3 groups (prior maximal distance P= 0.007743)

Partition 6 : found 2 groups (prior maximal distance P= 0.012915)

Partition 7 : found 2 groups (prior maximal distance P= 0.021544)

Partition 8 : found 2 groups (prior maximal distance P= 0.035938)

Partition 9 : found 2 groups (prior maximal distance P= 0.059948)

Partition 10 : found 2 groups (prior maximal distance P= 0.100000)

**Taxonomic analysis of Paraguayan samples of *Homonota fasciata* Duméril & Bibron (1836) with the revalidation of *Homonota horrida* Burmeister (1861) (Reptilia: Squamata: Phyllodactylidae) and the description of a new species**

Cacciali P, Morando M, Medina CD, Köhler G, Motte M, Avila LJ - PeerJ 5:e3523; DOI 10.7717/peerj.3523

Groups detected when Initial Partition with prior maximal distance  $P=7.74e^{-03}$

**Group[ 1 ] n: 3 ;id: LJAMM-CNP\_10495 LJAMM-CNP\_10576 LJAMM-CNP\_5047**

**Group[ 2 ] n: 3 ;id: MNHNP\_11873 MNHNP\_12238 SMF\_101984**

**Group[ 3 ] n: 1 ;id: Phyllopezus\_SMF-100495**

Histogram of distances

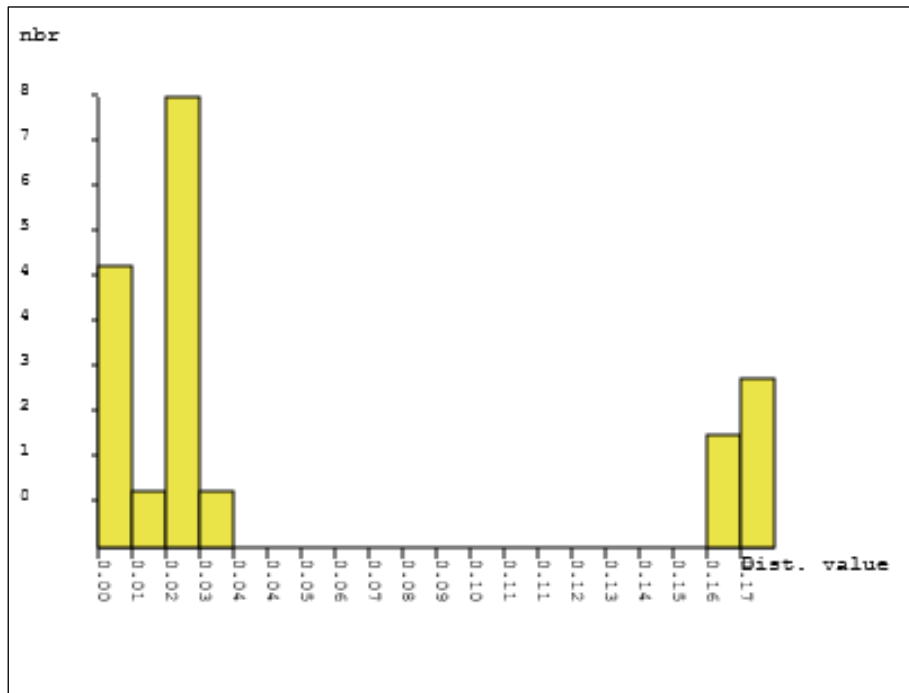

Ranked distances

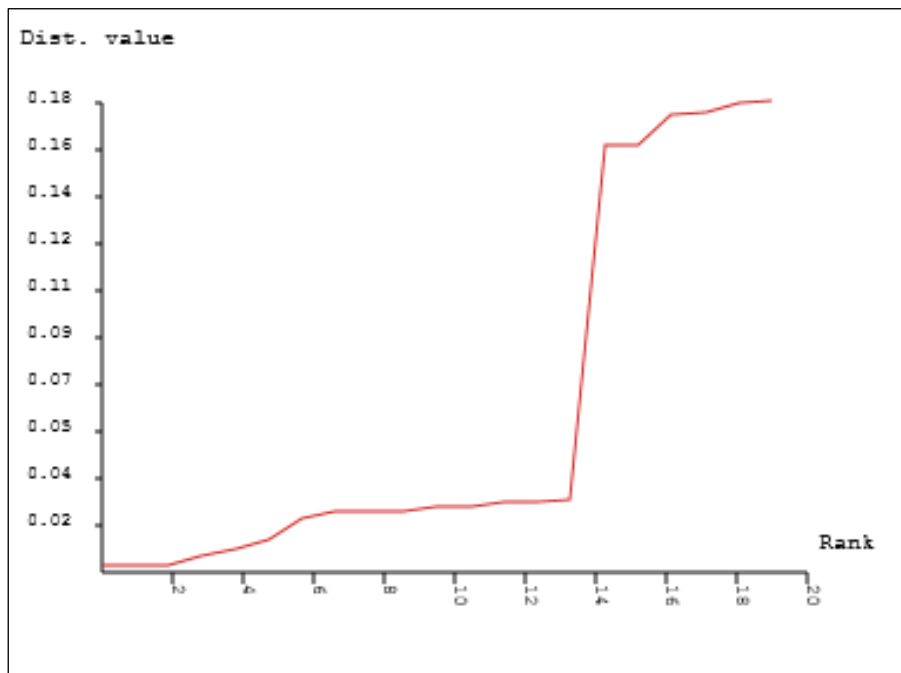



### Appendix S7

#### Results of PTP analysis

ML solution produced with PTP. Numbers on nodes indicate support values. The red clades represent putative species. In this case, one species is composed of Argentinean samples (LJAMM-CNP 5047, 10495, 10576), and the other of Paraguayan specimens (MNHNP 11873, 12238, SMF 101984).

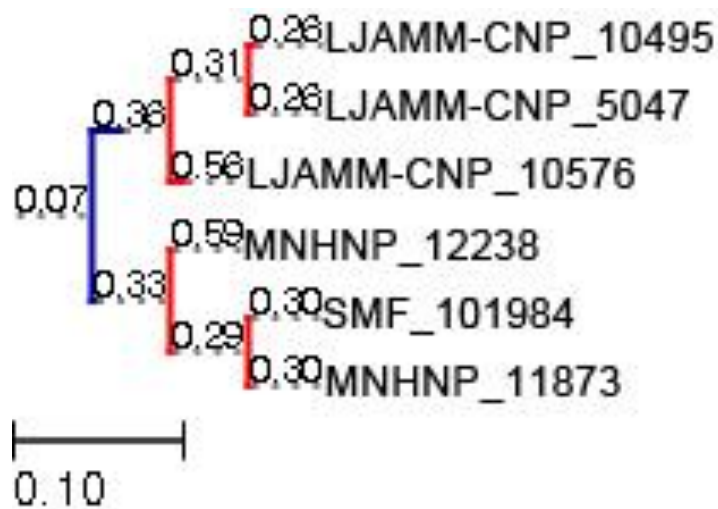

Appendix S8 - Individual gene trees (Explanations at the end)

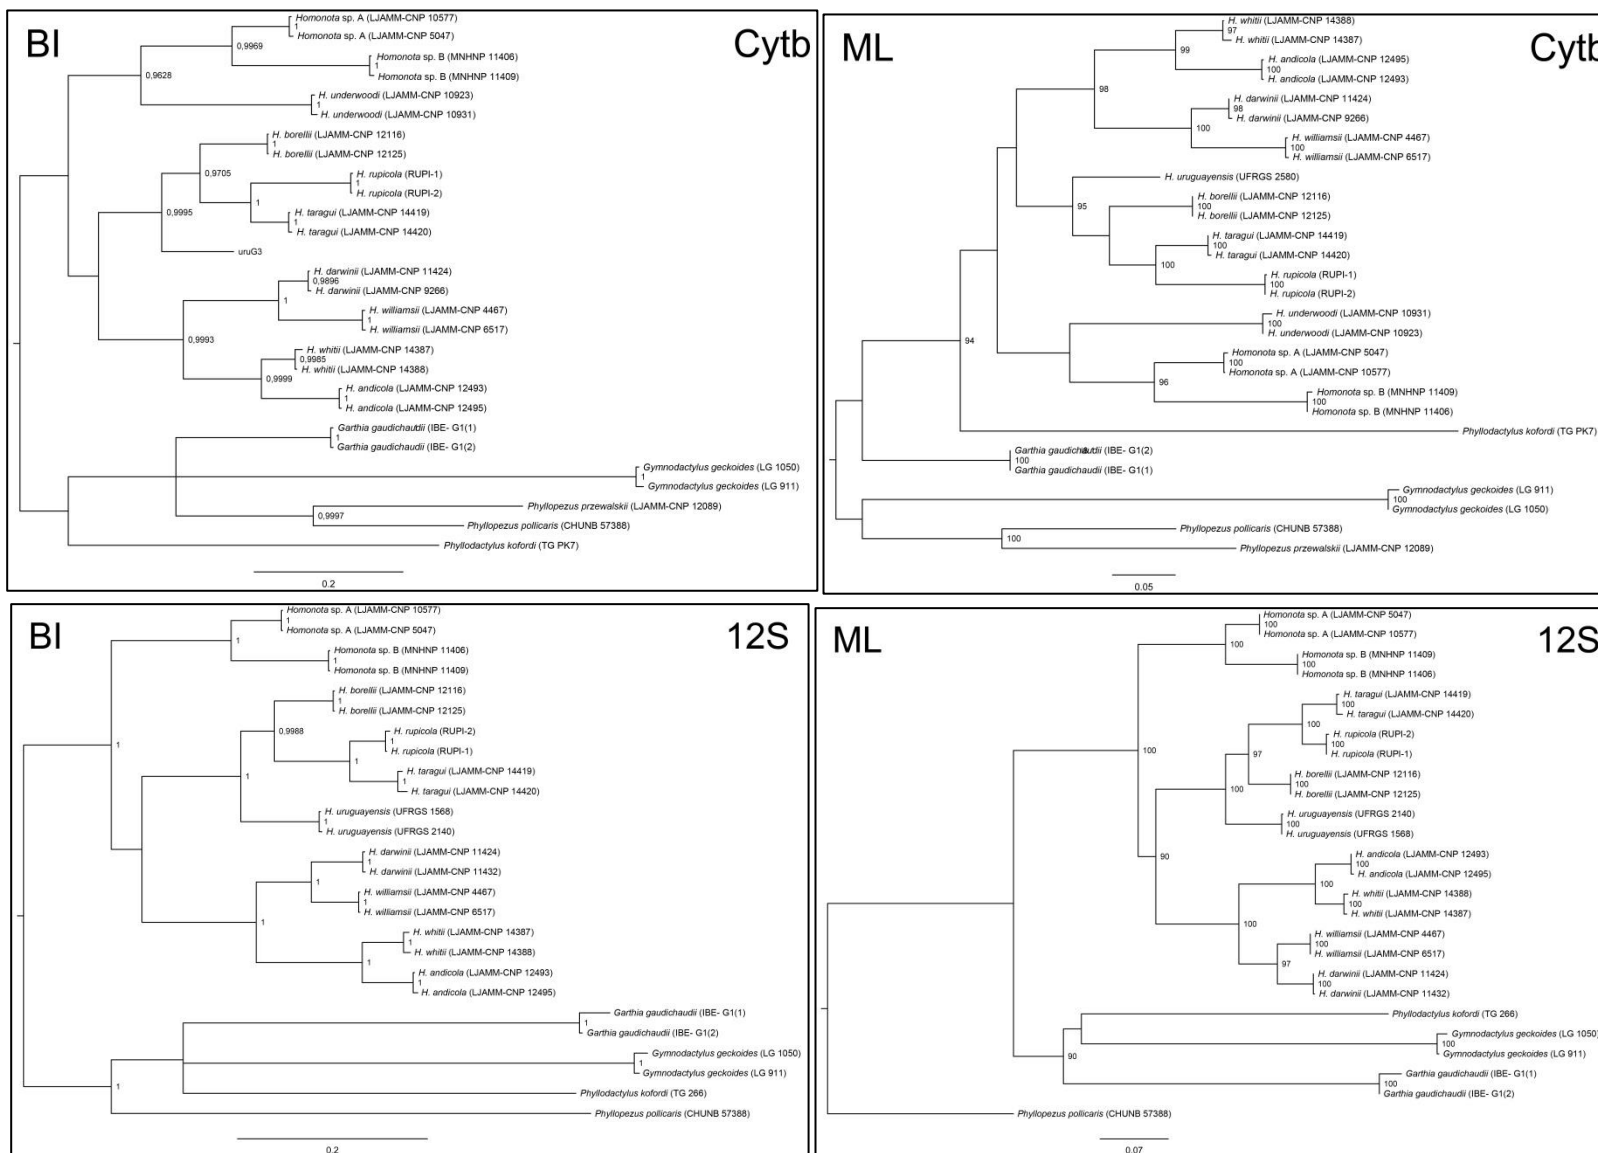

Appendix S8 (continuation)

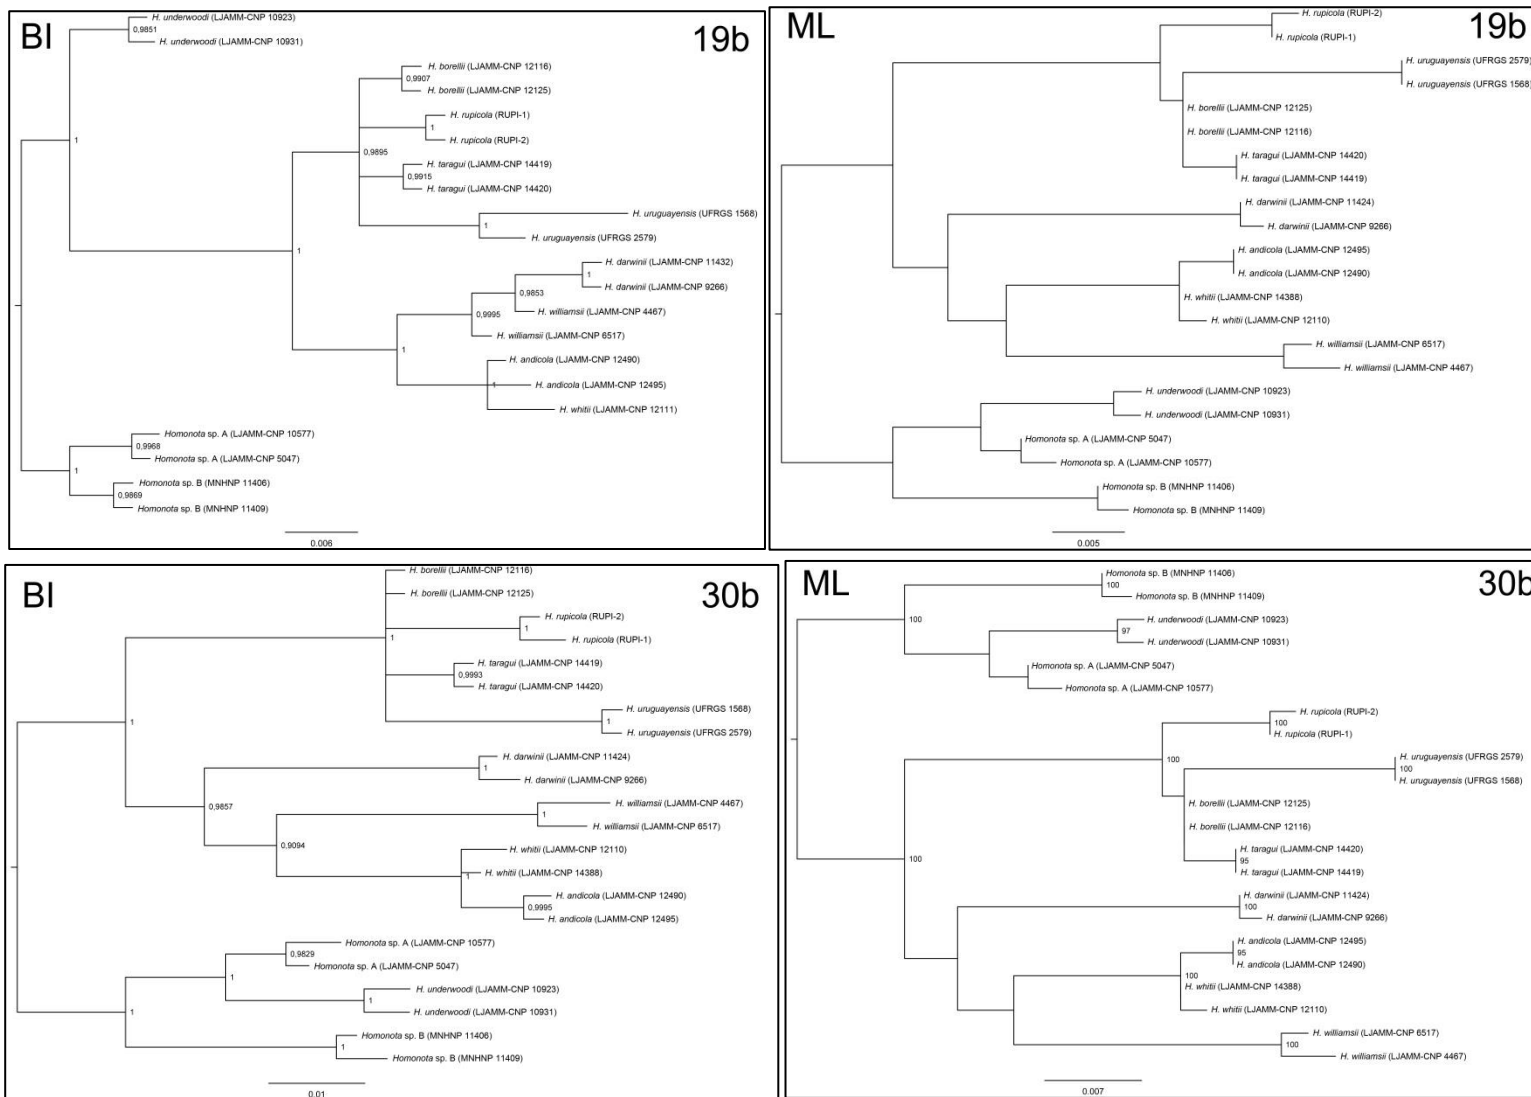

Appendix S8 (continuation)

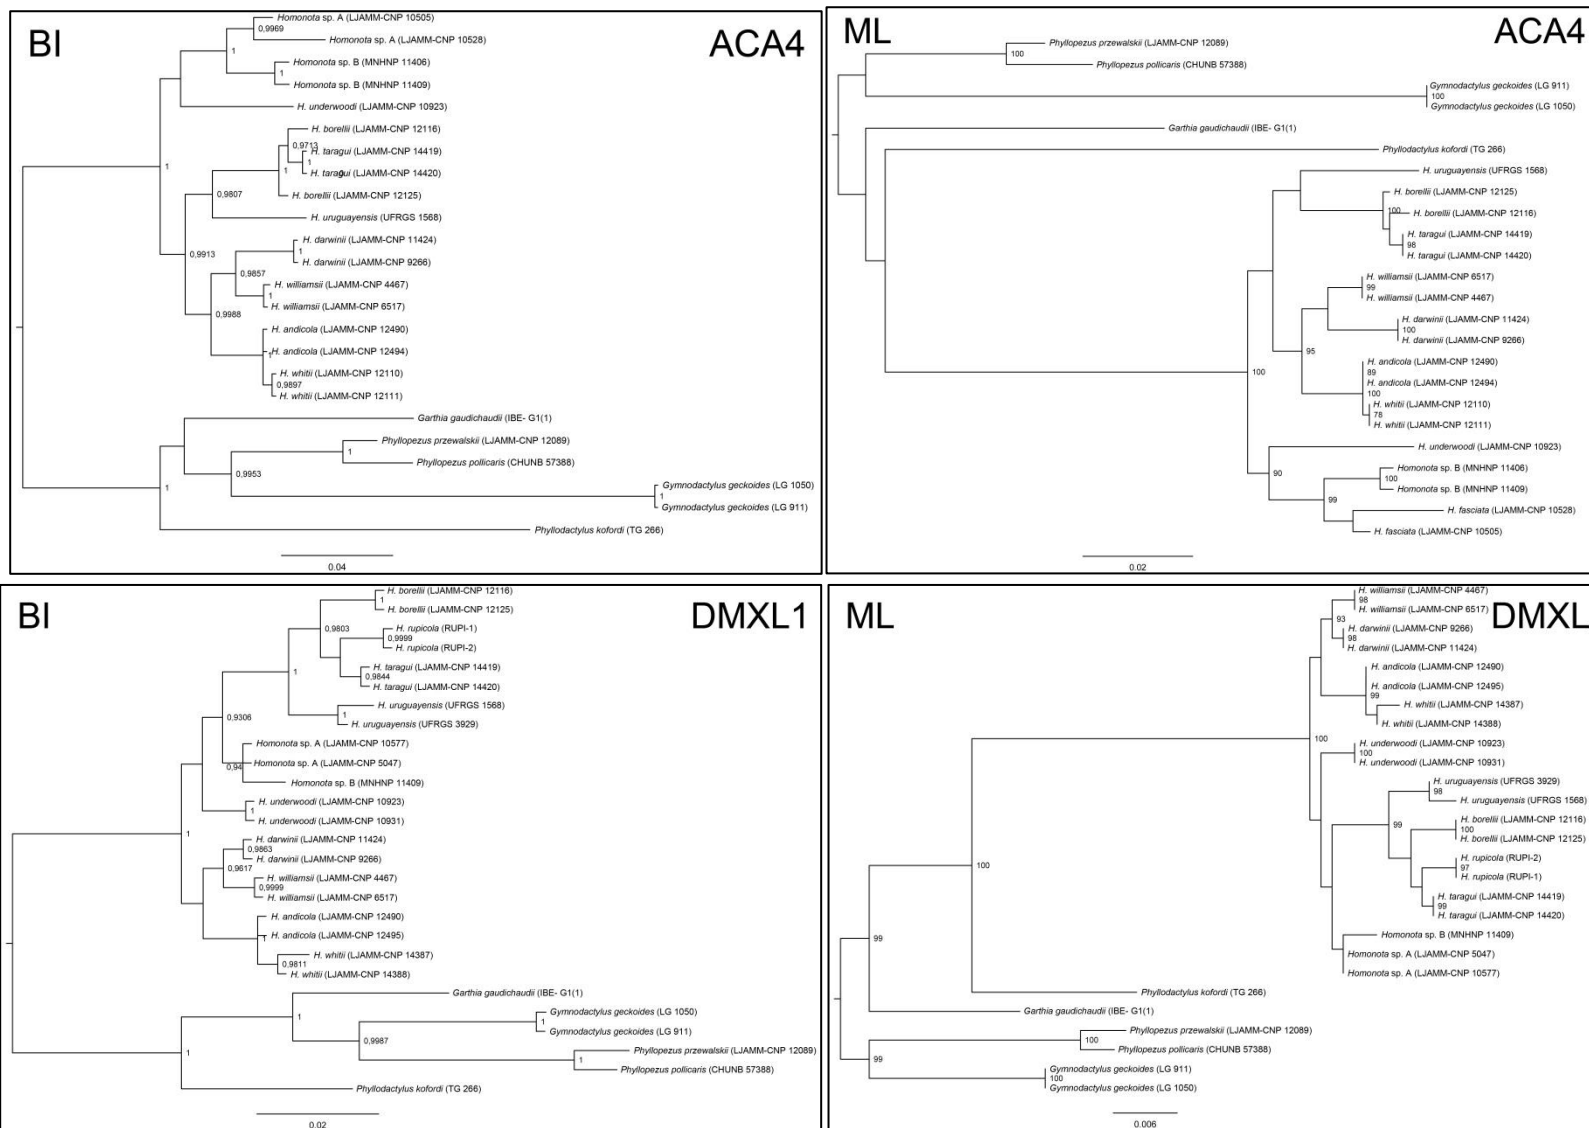

Appendix S8 (continuation)

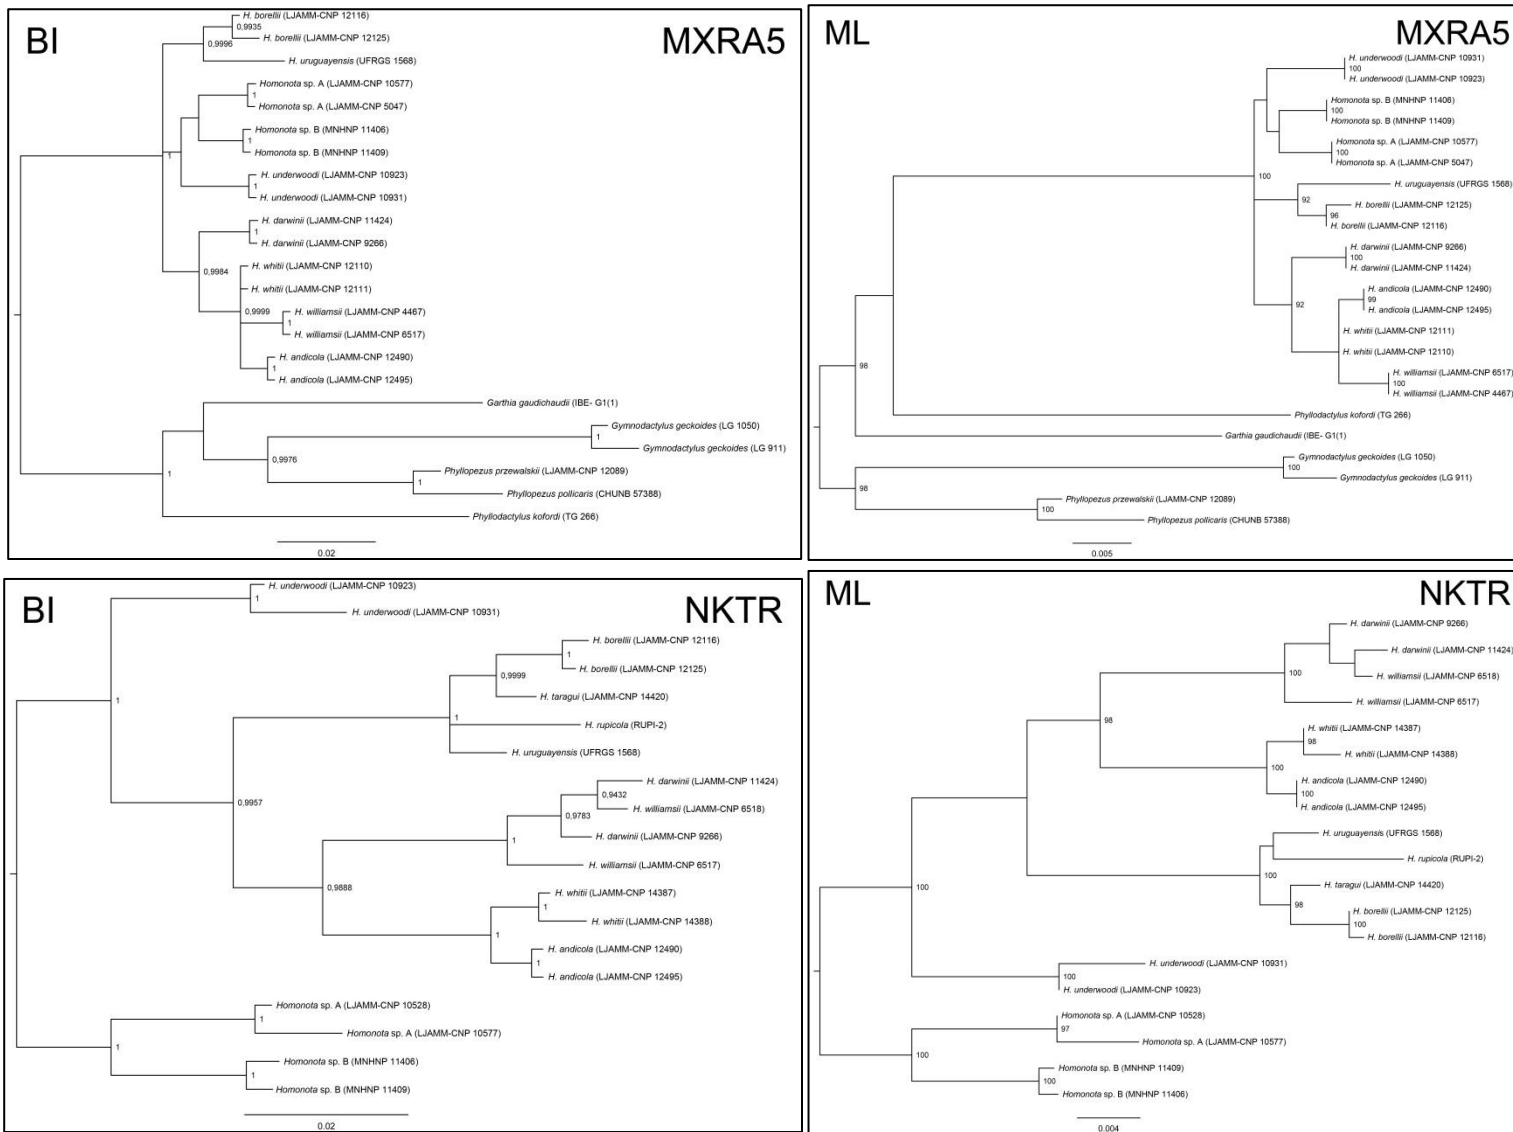

Appendix S8 (continuation)

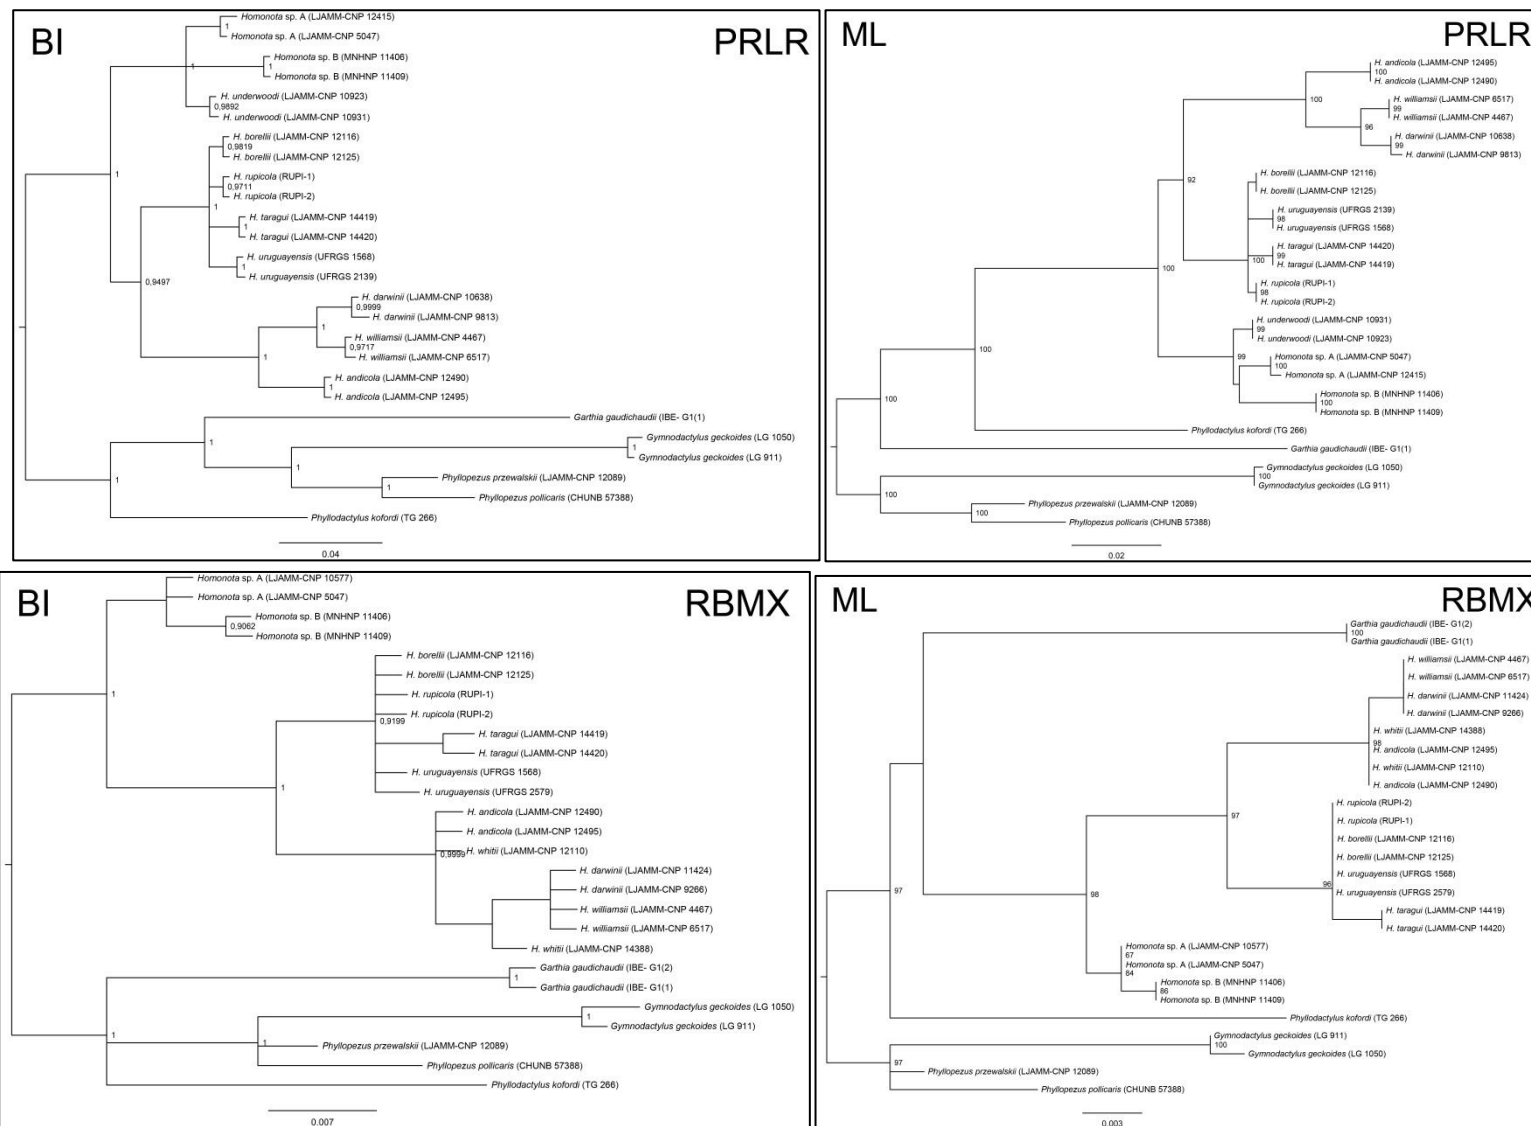

Appendix S8 (continuation)

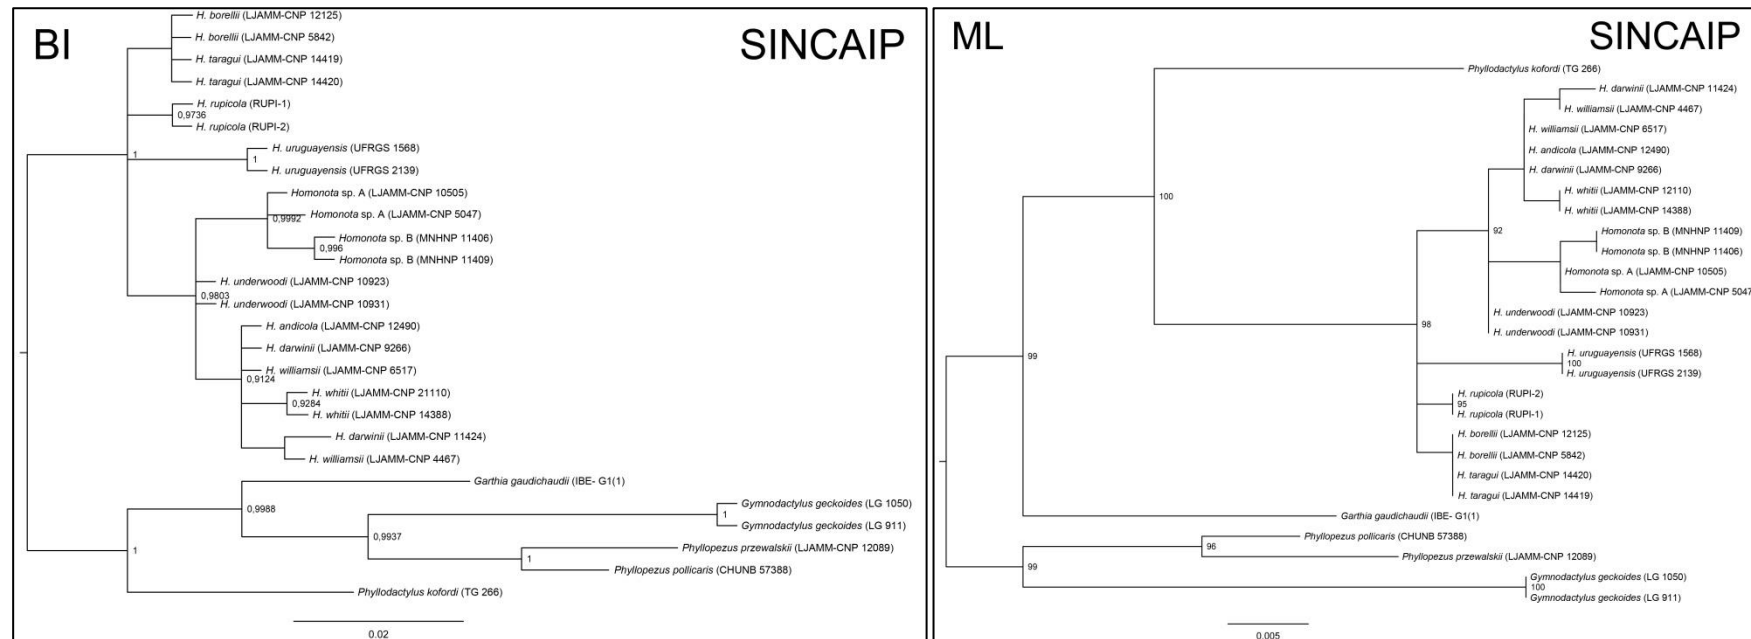

Individual gene trees generated by Bayesian analysis (BI) and Maximum Likelihood (ML). Acronyms for genes are *cytb* (cytochrome *b*), 12S (small ribosomal subunit), ACA4 (alpha-cardiac actin intron 4), DMXL1 (dmX-like protein 1), MXRA5 (encoding matrix remodeling associated intron 5), NKTR (natural killer-tumor recognition sequence), PRLR (prolactin receptor), RBMX (intron 8 and flanking exon regions of RNA binding motif protein), SINCAIP (synuclein alpha interacting protein), 19b and 30b (anonymous nuclear loci). The two first genes are mitochondrial, and the remaining nine are nuclear. Only values of  $\geq 0.90$  (for BI) and  $\geq 90$  (for ML) are shown.

**Taxonomic analysis of Paraguayan samples of *Homonota fasciata* Duméril & Bibron (1836) with the revalidation of *Homonota horrida* Burmeister (1861) (Reptilia: Squamata: Phyllodactylidae) and the description of a new species**

Cacciali P, Morando M, Medina CD, Köhler G, Motte M, Avila LJ - PeerJ 5:e3523; DOI 10.7717/peerj.3523

**Appendix S9 – Concatenated trees**

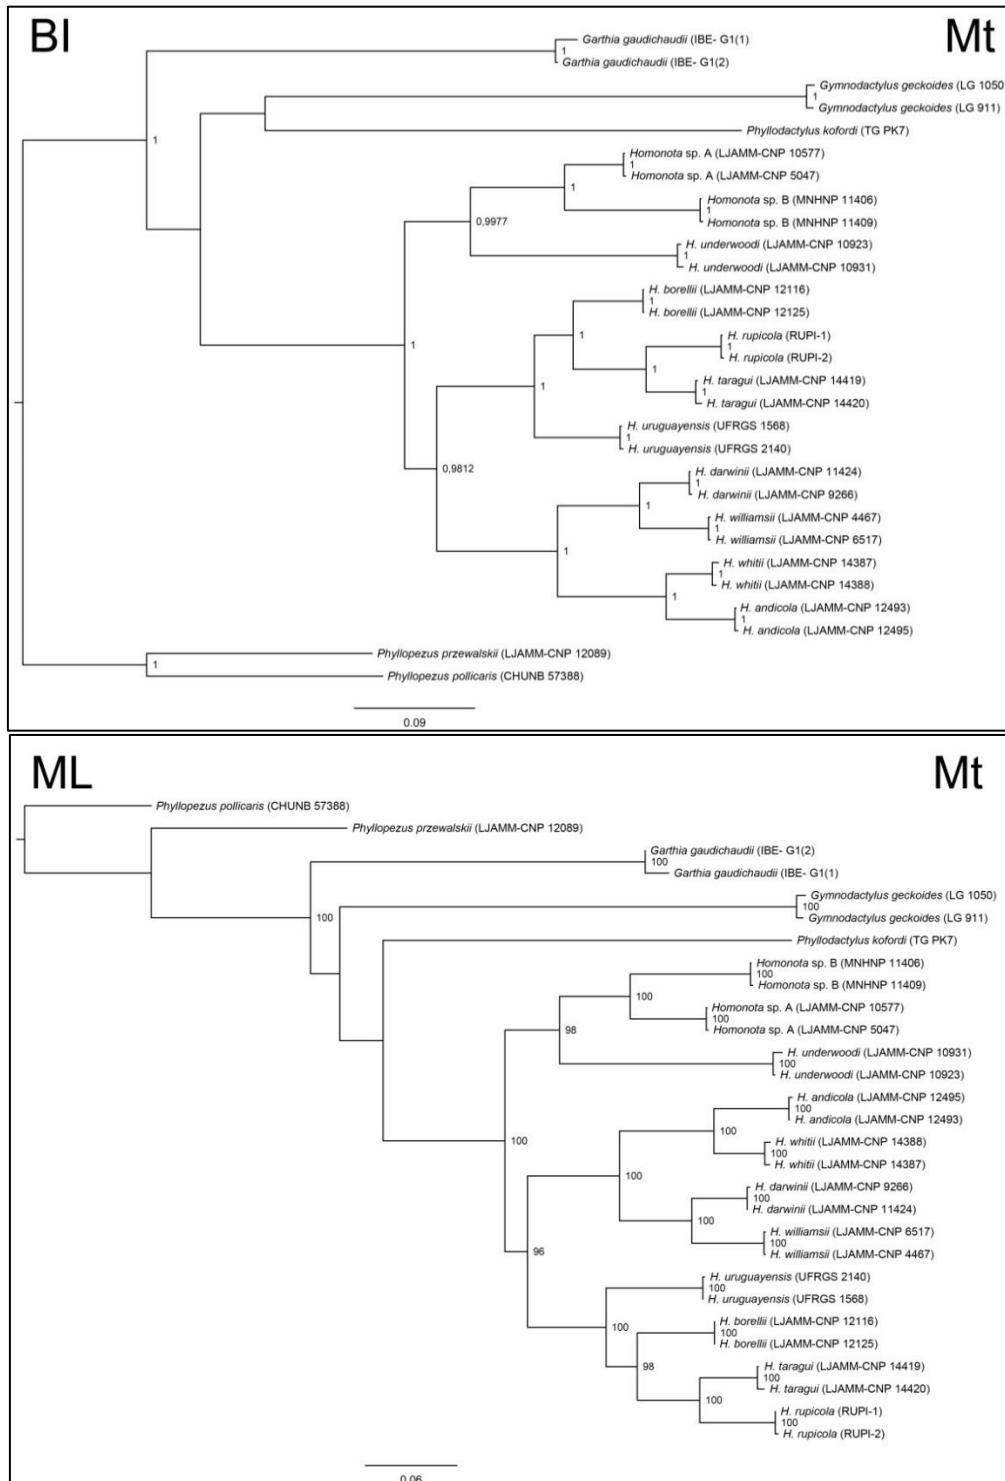

Bayesian (above) and Maximum Likelihood (below) trees inferred from concatenated mitochondrial genes. See Materials and Methods for indication of mitochondrial genes. Only values of  $\geq 0.90$  (for BI) and  $\geq 90$  (for ML) are shown.



**Taxonomic analysis of Paraguayan samples of *Homonota fasciata* Duméril & Bibron (1836) with the revalidation of *Homonota horrida* Burmeister (1861) (Reptilia: Squamata: Phyllodactylidae) and the description of a new species**

Cacciali P, Morando M, Medina CD, Köhler G, Motte M, Avila LJ - PeerJ 5:e3523; DOI 10.7717/peerj.3523

**Appendix S9 (continuation)**

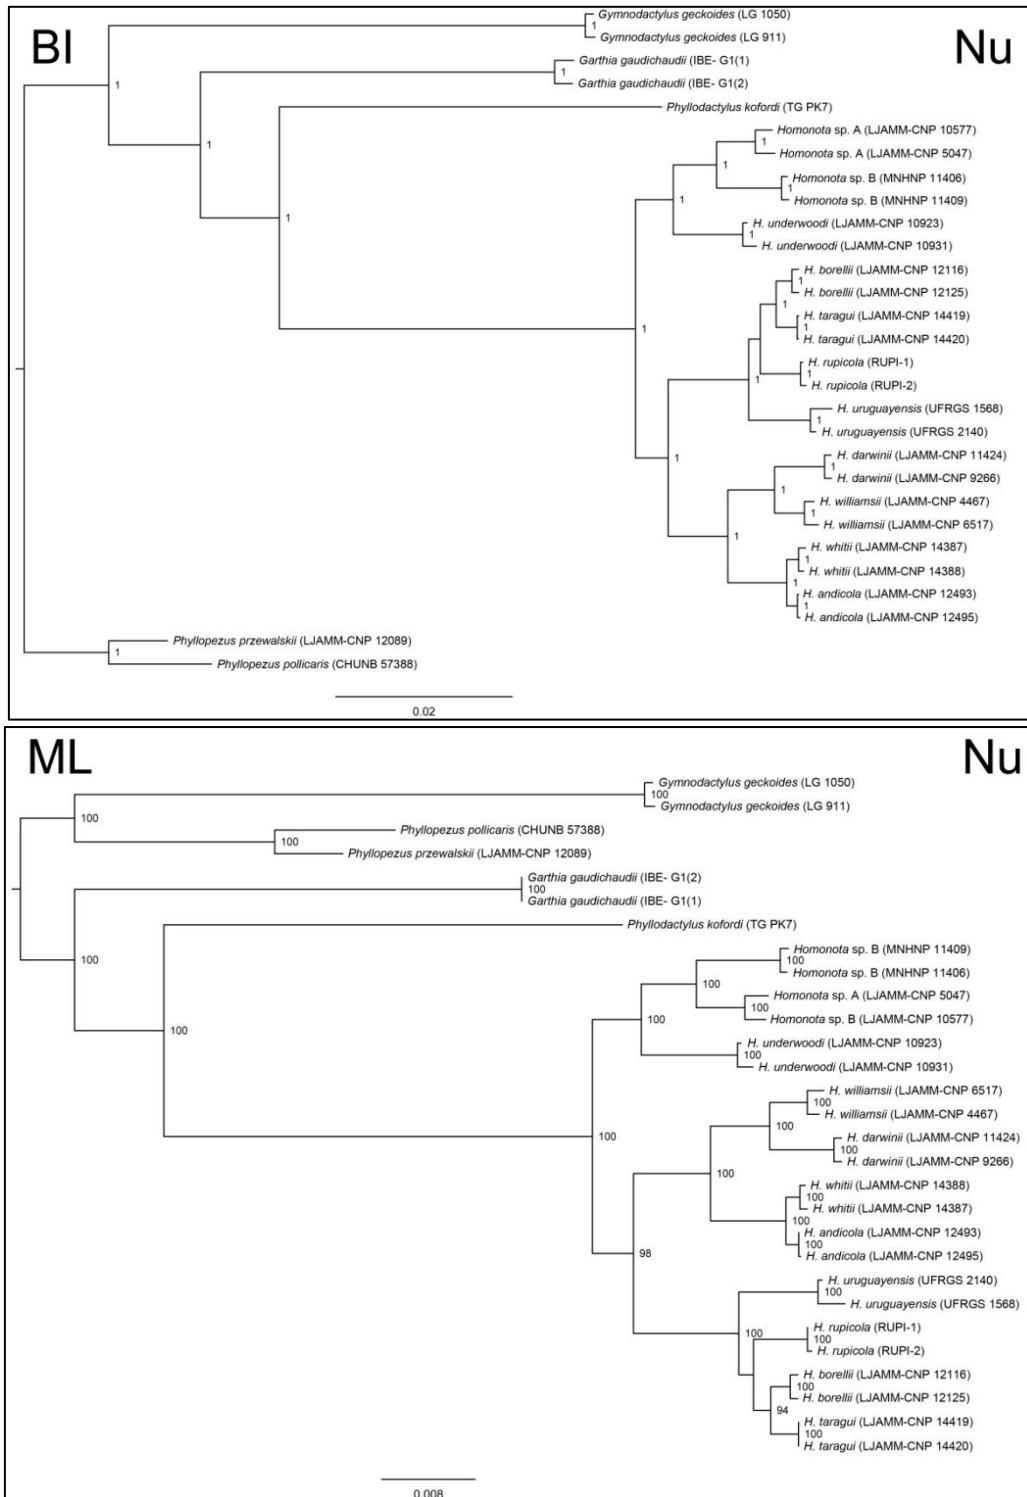

Bayesian (above) and Maximum Likelihood (below) trees inferred from concatenated nuclear genes. See Materials and Methods for indication of nuclear genes. Only values of  $\geq 0.90$  (for BI) and  $\geq 90$  (for ML) are shown.

**Taxonomic analysis of Paraguayan samples of *Homonota fasciata* Duméril & Bibron (1836) with the revalidation of *Homonota horrida* Burmeister (1861) (Reptilia: Squamata: Phyllodactylidae) and the description of a new species**

Cacciali P, Morando M, Medina CD, Köhler G, Motte M, Avila LJ - PeerJ 5:e3523; DOI 10.7717/peerj.3523

**Appendix S9 (continuation)**

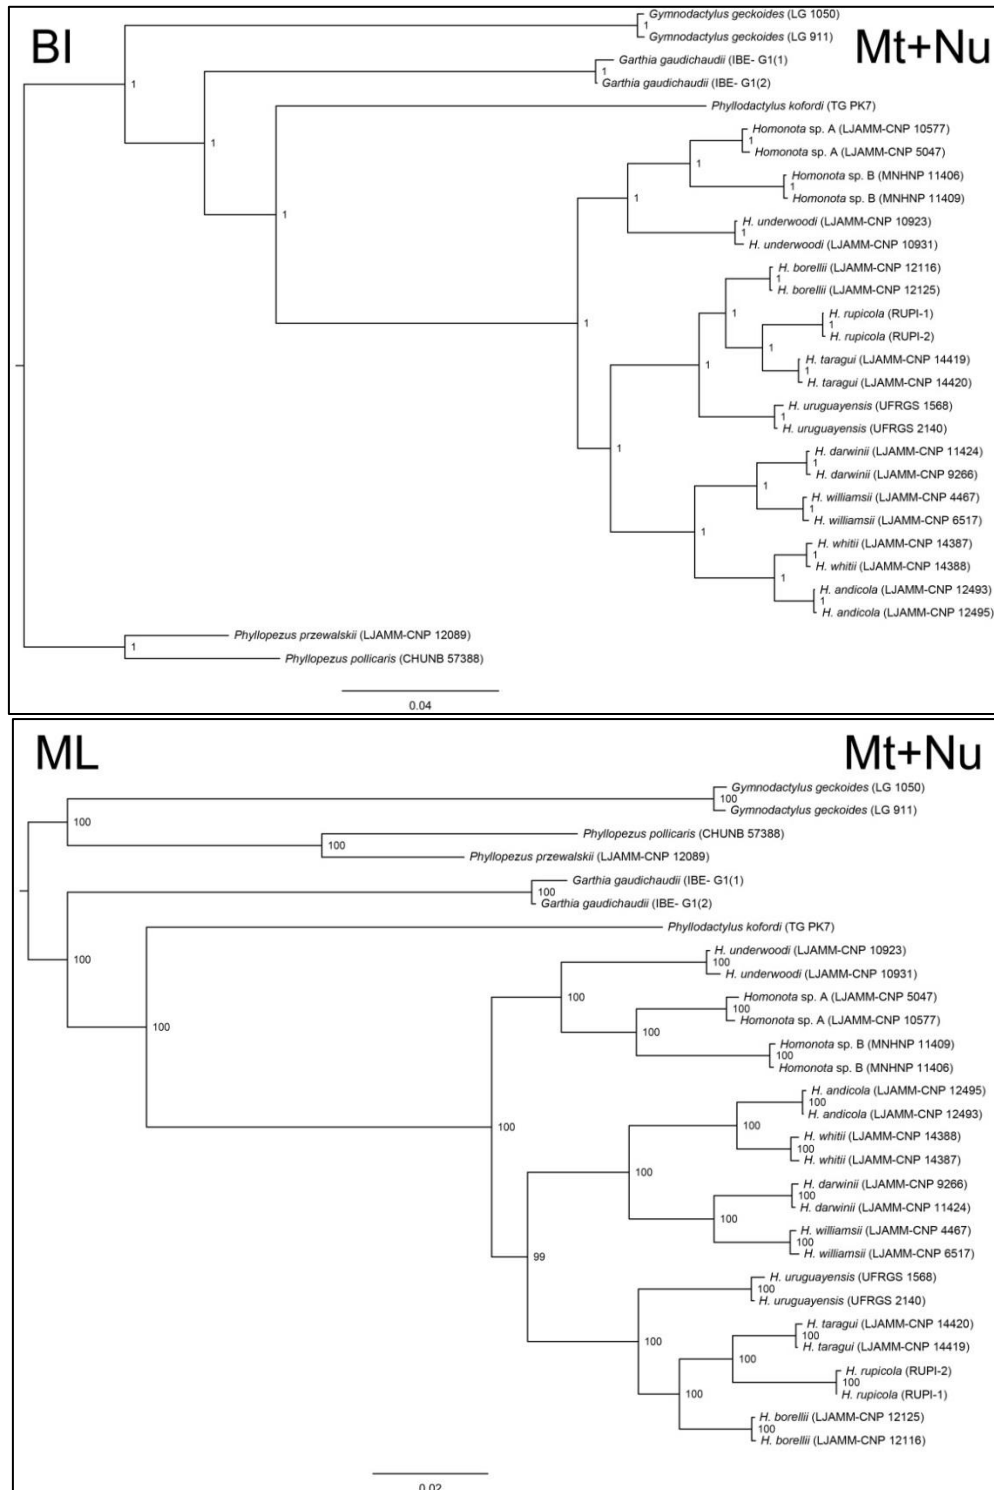

Bayesian (above) and Maximum Likelihood (below) trees inferred from concatenated mitochondrial and nuclear genes. Only values of  $\geq 0.90$  (for BI) and  $\geq 90$  (for ML) are shown.

**Taxonomic analysis of Paraguayan samples of *Homonota fasciata* Duméril & Bibron (1836) with the revalidation of *Homonota horrida* Burmeister (1861) (Reptilia: Squamata: Phyllodactylidae) and the description of a new species**

Cacciali P, Morando M, Medina CD, Köhler G, Motte M, Avila LJ - PeerJ 5:e3523; DOI 10.7717/peerj.3523

## Appendix S10

### Most contributing variables for DA

#### A- Continuous variables

Contribution values for the three principal axes of the discriminant function analysis of continuous variables. Most highly contributing variables in bold. Abbreviations: AL (arm length), EMD (eye–meatus distance), END (eye–nostril distance), ESD (eye–snout distance), FL (foot length), HH (head height), HL (head length), HW (head width), ID (interorbital distance), IND (internostril distance), SVL (snout–vent length), TL (tibial length), TrL (trunk length). See “Morphological Approach” in the Materials and Methods section for details about measurements.

| Variables | Axis 1          | Axis 2         | Axis 3         |
|-----------|-----------------|----------------|----------------|
| SVL       | <b>-0.25403</b> | <b>2.77550</b> | <b>0.40997</b> |
| TrL       | <b>-0.45427</b> | <b>1.26620</b> | 0.25683        |
| FL        | -0.09004        | 0.50099        | -0.07282       |
| TL        | 0.06197         | 0.43801        | 0.05459        |
| AL        | 0.03385         | 0.50497        | <b>0.39286</b> |
| HL        | -0.21662        | 0.47604        | <b>0.37498</b> |
| HW        | -0.21465        | 0.32961        | 0.33726        |
| HH        | -0.23825        | 0.11503        | 0.23913        |
| END       | -0.08492        | 0.14669        | 0.02613        |
| ESD       | -0.11675        | 0.25690        | 0.20150        |
| EMD       | 0.02475         | 0.24455        | 0.21194        |
| ID        | -0.01922        | 0.17126        | 0.20578        |
| IND       | -0.06752        | 0.06858        | 0.05570        |

#### B- Discrete variables

Contribution values for the three principal axes of the discriminant function analysis of discrete variables. Most highly contributing variables in bold. Abbreviations: 3FL (third finger lamellae), 4TL (fourth toe lamellae), DT (dorsal tubercles), LVS (longitudinal rows of ventral scales), TVS (transversal rows of ventral scales). See “Morphological Approach” in the Materials and Methods section for details about counts.

| Variables | Axis 1         | Axis 2          | Axis 3         |
|-----------|----------------|-----------------|----------------|
| DT        | <b>1.08450</b> | 0.23782         | 1.22050        |
| TVS       | 0.67569        | <b>-1.77600</b> | -0.65160       |
| LVS       | -0.34039       | -0.87093        | <b>1.46070</b> |
| 4TL       | 0.59106        | 0.39061         | 0.33669        |
| 3FL       | 0.84406        | -0.14672        | 0.42342        |

**Taxonomic analysis of Paraguayan samples of *Homonota fasciata* Duméril & Bibron (1836) with the revalidation of *Homonota horrida* Burmeister (1861) (Reptilia: Squamata: Phyllodactylidae) and the description of a new species**

Cacciali P, Morando M, Medina CD, Köhler G, Motte M, Avila LJ - PeerJ 5:e3523; DOI 10.7717/peerj.3523

**Appendix S11**

**Matrix of metric data**

Raw metric data (in mm) used for analyses. See Materials and Methods section for explanation of the characters. Missing data indicated with “?”. Argentinean populations belong to LJAMM-CNP collection, whereas Paraguayan specimens are housed in the MNHNP and SMF.

| Specimen       | SVL | TrL | FL | TL   | AL   | HL   | HW   | HH  | END | ESD | EMD | ID  | IND | Sex |
|----------------|-----|-----|----|------|------|------|------|-----|-----|-----|-----|-----|-----|-----|
| LJAMM-CNP 6520 | 57  | 24  | 10 | 9.2  | 12.2 | 12.8 | 8.6  | 6.7 | 4.3 | 5.3 | 4.8 | 3.8 | 1.7 | F   |
| LJAMM-CNP 6530 | 63  | 29  | 11 | 12.5 | 15.4 | 14.6 | 10.4 | 7.6 | 4.7 | 6.3 | 5.3 | 4.8 | 1.7 | F   |
| LJAMM-CNP 6532 | 55  | 23  | 9  | 9.6  | ?    | 13.5 | 10.5 | 6.9 | 4.6 | 5.8 | 5.2 | 5.2 | 1.8 | M   |
| LJAMM-CNP 6533 | 59  | 25  | ?  | 11.2 | 13.4 | 13.9 | 11.1 | 7.1 | 4.8 | 6.1 | 4.9 | 4.9 | 2.3 | F   |
| LJAMM-CNP 6535 | 52  | 20  | 11 | 9.6  | ?    | ?    | ?    | ?   | ?   | ?   | ?   | ?   | ?   | M   |
| LJAMM-CNP 6967 | 41  | 18  | 7  | 8.3  | 11.9 | 10.5 | 10.4 | 5.8 | 3.5 | 4.1 | 4.4 | 4.5 | 1.7 | M   |
| LJAMM-CNP 6968 | 45  | 18  | 9  | 9.0  | 13.7 | ?    | 8.9  | ?   | ?   | ?   | ?   | 4.6 | 1.6 | M   |
| LJAMM-CNP 7670 | 55  | 22  | 11 | 11.3 | ?    | 10.5 | 8.6  | 5.8 | 4.2 | 4.9 | 4.6 | 4.5 | 1.8 | F   |
| LJAMM-CNP 7674 | 50  | 23  | 9  | 9.9  | 11.9 | 11.8 | 8.3  | 6.3 | 4.1 | 4.8 | 4.7 | 4.5 | 1.6 | F   |
| LJAMM-CNP 7804 | 52  | 20  | 11 | 10.2 | 12.1 | 9.8  | 10.1 | 6.1 | 2.9 | 3.6 | 4.7 | 5.3 | 2.3 | F   |
| LJAMM-CNP 8713 | 56  | 25  | 8  | 10.5 | ?    | ?    | 10.6 | ?   | ?   | ?   | ?   | 4.8 | 2.2 | M   |

**Taxonomic analysis of Paraguayan samples of *Homonota fasciata* Duméril & Bibron (1836) with the revalidation of *Homonota horrida* Burmeister (1861) (Reptilia: Squamata: Phyllodactylidae) and the description of a new species**

Cacciali P, Morando M, Medina CD, Köhler G, Motte M, Avila LJ - PeerJ 5:e3523; DOI 10.7717/peerj.3523

| Specimen        | SVL | TrL | FL | TL   | AL   | HL   | HW   | HH  | END | ESD | EMD | ID  | IND | Sex |
|-----------------|-----|-----|----|------|------|------|------|-----|-----|-----|-----|-----|-----|-----|
| LJAMM-CNP 10493 | 53  | 21  | 10 | 10.4 | 14.4 | 11.7 | 8.7  | ?   | 3.7 | 4.6 | 4.5 | 4.5 | 2.0 | M   |
| LJAMM-CNP 10496 | 51  | 23  | 9  | 9.4  | 12.9 | 12.5 | 9.9  | 5.5 | 4.0 | 4.8 | 5.1 | 4.4 | 1.8 | F   |
| LJAMM-CNP 10523 | 57  | 22  | ?  | 10.3 | 14.5 | 14.5 | 12.4 | 6.7 | 4.8 | 6.0 | 5.9 | 5.8 | 1.8 | F   |
| LJAMM-CNP 10526 | 64  | 27  | 12 | 12.0 | 16.8 | 14.3 | 10.8 | 6.3 | 4.9 | 6.1 | 5.5 | 5.2 | 1.9 | F   |
| LJAMM-CNP 10576 | 51  | 18  | 9  | 10.1 | 12.7 | 13.2 | 10.8 | 6.1 | 4.5 | 5.8 | 5.3 | 4.6 | 1.8 | M   |
| LJAMM-CNP 10577 | 42  | 16  | 8  | 8.3  | 11.8 | 10.6 | 8.5  | 4.9 | 3.7 | 4.2 | 4.2 | 4.1 | 1.2 | F   |
| LJAMM-CNP 10578 | 47  | 17  | 9  | 9.5  | 14.2 | 14.1 | 9.2  | 6.7 | 4.8 | 6.0 | 5.5 | 4.4 | 2.2 | F   |
| LJAMM-CNP 10579 | 53  | 20  | ?  | 10.4 | 13.1 | 13.4 | 9.9  | 6.4 | 4.1 | 5.3 | 5.3 | 4.1 | 2.0 | F   |
| LJAMM-CNP 10584 | 59  | 23  | 9  | 11.4 | 14.7 | 16.1 | 10.4 | 7.8 | 5.0 | 6.6 | 6.5 | 5.1 | 2.3 | M   |
| LJAMM-CNP 13948 | 44  | 19  | 9  | 8.9  | 12.8 | 10.7 | 8.2  | 5.5 | 3.2 | 4.3 | 4.4 | 4.1 | 1.7 | M   |
| LJAMM-CNP 14551 | 51  | 24  | 9  | 9.9  | 12.8 | 12.0 | 10.0 | ?   | 3.9 | 5.0 | 4.7 | 4.8 | 1.5 | M   |
| MNHNP 2821      | 61  | 28  | 12 | 9.9  | 14.6 | 14.4 | 11   | 7.7 | 4.5 | 5.9 | 5.3 | 4.8 | 2.4 | F   |
| MNHNP 9037      | 65  | 28  | 12 | 11.3 | 15   | 17.3 | 12.4 | 8.6 | 5.8 | 6.8 | 6.0 | 5.2 | 2.5 | F   |
| MNHNP 9038      | 51  | 23  | 9  | 9.8  | 13.1 | 13.1 | 10.2 | 7.1 | 4.3 | 5.1 | 4.9 | 4.4 | 2   | M   |
| MNHNP 9131      | 41  | 20  | 9  | 8.4  | 11.8 | 11.4 | 9.5  | 6.4 | 3.9 | 3.6 | 4.4 | 4.2 | 1.4 | M   |
| MNHNP 11406     | 47  | 18  | 7  | 8.3  | 11.5 | 11.4 | 8.8  | 6.3 | 3.7 | 5   | 3.6 | 4.1 | 1.8 | ?   |

**Taxonomic analysis of Paraguayan samples of *Homonota fasciata* Duméril & Bibron (1836) with the revalidation of *Homonota horrida* Burmeister (1861) (Reptilia: Squamata: Phyllodactylidae) and the description of a new species**

Cacciali P, Morando M, Medina CD, Köhler G, Motte M, Avila LJ - PeerJ 5:e3523; DOI 10.7717/peerj.3523

| Specimen    | SVL | TrL | FL | TL   | AL   | HL   | HW   | HH  | END | ESD | EMD | ID  | IND | Sex |
|-------------|-----|-----|----|------|------|------|------|-----|-----|-----|-----|-----|-----|-----|
| MNHNP 11410 | 39  | 15  | 8  | 7.2  | 10.2 | 10.7 | 8.1  | 5.8 | 3.7 | 4.4 | 3.6 | 3.7 | 1.7 | M   |
| MNHNP 11419 | 40  | 17  | 8  | 7.6  | 9.4  | 10.5 | 8.1  | 6.6 | 3.4 | 4.3 | 3.6 | 3.5 | 1.5 | ?   |
| MNHNP 11421 | 45  | 17  | 9  | 8.1  | 11   | 10.9 | 9.2  | 6.7 | 3.7 | 5   | 3.9 | 3.8 | 1.7 | M   |
| MNHNP 11423 | 45  | 19  | 9  | 9.1  | 11.6 | 11.6 | 9    | 6.4 | 3.4 | 4.5 | 4.0 | 4   | 1.6 | M   |
| MNHNP 11850 | 53  | 25  | 9  | 9.8  | 12.2 | 13.3 | 10.6 | 7.9 | 4.7 | 5.9 | 4.5 | 5.1 | 2.5 | M   |
| MNHNP 11855 | 58  | 28  | 11 | 11.1 | 13.6 | 13.7 | 11.2 | 8.4 | 4.6 | 6.4 | 5.6 | 5.3 | 2.3 | F   |
| MNHNP 11860 | 51  | 23  | 10 | 9.4  | 13.1 | 12.9 | 9.7  | 6.8 | 4.9 | 5.8 | 4.6 | 4.6 | 1.9 | F   |
| MNHNP 11872 | 48  | 20  | 9  | 8.4  | 11.8 | 11.5 | 8.9  | 6.4 | 4.5 | 4.9 | 3.8 | 3.8 | 1.9 | M   |
| MNHNP 12238 | 60  | 26  | 11 | 10.8 | 14.1 | 14.8 | 13.3 | 7.9 | 4.6 | 6.6 | 5.1 | 5.5 | 2.5 | F   |
| SMF 29277   | 37  | 16  | 6  | 7.1  | 9.9  | 9.8  | 7.8  | 6.4 | 2.8 | 4.2 | 3.6 | 3.6 | 1.9 | ?   |
| SMF 101984  | 53  | 24  | 9  | 9.8  | 13.2 | 13.4 | 10.4 | 6.7 | 4.1 | 5.2 | 4.6 | 4.6 | 1.9 | ?   |

**Taxonomic analysis of Paraguayan samples of *Homonota fasciata* Duméril & Bibron (1836) with the revalidation of *Homonota horrida* Burmeister (1861) (Reptilia: Squamata: Phyllodactylidae) and the description of a new species**

Cacciali P, Morando M, Medina CD, Köhler G, Motte M, Avila LJ - PeerJ 5:e3523; DOI 10.7717/peerj.3523

**Appendix S12**

**Matrix of meristic data**

Raw meristic data used for analyses. See Materials and Methods section for explanation of the characters. Missing data indicated with “?”. Argentinean populations belong to LJAMM-CNP collection, whereas Paraguayan specimens are housed in the MNHNP and SMF.

| <b>Specimen</b> | <b>DT</b> | <b>TVS</b> | <b>LVS</b> | <b>SL</b> | <b>IF</b> | <b>4TL</b> | <b>3FL</b> | <b>Sex</b> |
|-----------------|-----------|------------|------------|-----------|-----------|------------|------------|------------|
| LJAMM-CNP 6520  | 30        | 43         | 19         | 9         | 7         | 19         | 16         | F          |
| LJAMM-CNP 6530  | 28        | 45         | 15         | 9         | 7         | 20         | 14         | F          |
| LJAMM-CNP 6532  | 33        | 48         | 16         | 7         | 6         | 18         | 13         | M          |
| LJAMM-CNP 6533  | 31        | 36         | 15         | 8         | 7         | 19         | 14         | F          |
| LJAMM-CNP 6535  | 34        | 44         | 18         | 8         | 7         | 21         | 17         | M          |
| LJAMM-CNP 6967  | 34        | 42         | 17         | 9         | 7         | 16         | 15         | M          |
| LJAMM-CNP 6968  | 30        | 42         | 18         | 8         | 8         | 17         | 15         | M          |
| LJAMM-CNP 7670  | 35        | 47         | 14         | 8         | 6         | 20         | 14         | F          |
| LJAMM-CNP 7674  | 35        | 40         | 13         | 8         | 6         | 20         | 14         | F          |
| LJAMM-CNP 7804  | 34        | 43         | 17         | 8         | 7         | 20         | 16         | F          |
| LJAMM-CNP 8713  | 32        | 48         | 17         | 8         | 6         | 20         | 16         | M          |

**Taxonomic analysis of Paraguayan samples of *Homonota fasciata* Duméril & Bibron (1836) with the revalidation of *Homonota horrida* Burmeister (1861) (Reptilia: Squamata: Phyllodactylidae) and the description of a new species**

Cacciali P, Morando M, Medina CD, Köhler G, Motte M, Avila LJ - PeerJ 5:e3523; DOI 10.7717/peerj.3523

| Specimen        | DT | TVS | LVS | SL | IF | 4TL | 3FL | Sex |
|-----------------|----|-----|-----|----|----|-----|-----|-----|
| LJAMM-CNP 10493 | 32 | 39  | 14  | 8  | 6  | 17  | 14  | M   |
| LJAMM-CNP 10496 | 33 | 39  | 16  | 8  | 6  | 18  | 15  | F   |
| LJAMM-CNP 10523 | 32 | 41  | 15  | 8  | 6  | 19  | 14  | F   |
| LJAMM-CNP 10526 | 34 | 39  | 13  | 8  | 6  | 21  | 16  | F   |
| LJAMM-CNP 10576 | 33 | 46  | 20  | 8  | 7  | 22  | 17  | M   |
| LJAMM-CNP 10577 | 34 | 42  | 16  | 7  | 7  | 20  | 16  | F   |
| LJAMM-CNP 10578 | 36 | 42  | 19  | 9  | 7  | 21  | 15  | F   |
| LJAMM-CNP 10579 | 37 | 42  | 15  | 8  | 7  | ?   | 16  | F   |
| LJAMM-CNP 10584 | 33 | 43  | 16  | 9  | 6  | 20  | 15  | M   |
| LJAMM-CNP 13948 | 29 | 42  | 14  | 8  | 6  | 18  | 14  | M   |
| LJAMM-CNP 14551 | 36 | 45  | 16  | 9  | 8  | 21  | 14  | M   |
| MNHNP 2821      | 29 | 42  | 17  | 8  | 6  | 20  | 14  | F   |
| MNHNP 9037      | 34 | 42  | 16  | 7  | 6  | 19  | 15  | F   |
| MNHNP 9038      | 31 | 40  | 12  | 7  | 6  | 17  | 12  | M   |
| MNHNP 9131      | 29 | 40  | 17  | 8  | 6  | 17  | 13  | M   |
| MNHNP 11406     | 32 | ?   | ?   | 8  | 6  | 19  | 13  | ?   |



**Taxonomic analysis of Paraguayan samples of *Homonota fasciata* Duméril & Bibron (1836) with the revalidation of *Homonota horrida* Burmeister (1861) (Reptilia: Squamata: Phyllodactylidae) and the description of a new species**

Cacciali P, Morando M, Medina CD, Köhler G, Motte M, Avila LJ - PeerJ 5:e3523; DOI 10.7717/peerj.3523

| Specimen    | DT | TVS | LVS | SL | IF | 4TL | 3FL | Sex |
|-------------|----|-----|-----|----|----|-----|-----|-----|
| MNHNP 11410 | 28 | ?   | ?   | 9  | 6  | ?   | 13  | M   |
| MNHNP 11419 | 29 | 43  | 15  | 8  | 6  | 18  | 11  | ?   |
| MNHNP 11421 | 28 | 41  | 15  | 9  | 7  | 17  | 13  | M   |
| MNHNP 11423 | 32 | 41  | 19  | 8  | 6  | 19  | 14  | M   |
| MNHNP 11850 | 31 | 39  | 18  | 8  | 6  | 18  | 12  | M   |
| MNHNP 11855 | 28 | 43  | 17  | 8  | 6  | 16  | 12  | F   |
| MNHNP 11860 | 31 | 37  | 19  | 6  | 7  | 18  | 12  | F   |
| MNHNP 11872 | 32 | 47  | 16  | 8  | 7  | 18  | 13  | M   |
| MNHNP 12238 | 32 | 42  | 19  | 9  | 6  | 17  | 13  | F   |
| SMF 29277   | 34 | 42  | 15  | 8  | 6  | 17  | 11  | ?   |
| SMF 101984  | 33 | 39  | 17  | 7  | 7  | 20  | 13  | ?   |
